# Supplementary material for: Buckwheat and Cardiometabolic Health: A Systematic Review and Meta-Analysis
Source: MDPI journal article supplement (doi:10.3390/jpm12121940), 2022-11-22
Supplement: s1 [file s1]

# **Buckwheat and Cardiometabolic Health: A Systematic Review and Meta-Analysis**

**Erand Llanaj** <sup>1,2,3</sup>, **Noushin Sadat Ahanchi** <sup>4</sup>, **Helga Dizdari** <sup>4</sup>, **Petek Eylul Taneri** <sup>4,5,6</sup>, **Christa D. Niehot** <sup>7</sup>, **Faina Wehrli** <sup>4,8</sup>, **Farnaz Khatami** <sup>4,8</sup>, **Hamidreza Raeisi-Dehkordi** <sup>4,9</sup>, **Lum Kastrati** <sup>4,9</sup>, **Arjola Bao** <sup>4,10</sup>, **Marija Glisic** <sup>4,11</sup> and **Taulant Muka** <sup>4,2\*</sup>

<sup>1</sup> Department of Molecular Epidemiology, German Institute of Human Nutrition Potsdam-Rehbrücke, 14558 Nuthetal, Germany

<sup>2</sup> *Epistudia*, 3012 Bern, Switzerland

<sup>3</sup> ELKH-DE Public Health Research Group of the Hungarian Academy of Sciences, Department of Public Health and Epidemiology, Faculty of Medicine, University of Debrecen, Kassai út 26, 4028 Debrecen, Hungary.

<sup>4</sup> Institute of Social and Preventive Medicine (ISPM), University of Bern, 3012 Bern, Switzerland

<sup>5</sup> School of Nursing and Midwifery, National University of Ireland Galway, Galway, Ireland

<sup>6</sup> HRB-Trials Methodology Research Network, H91 TK33 Galway, Ireland

<sup>7</sup> Literature Searches Support, 3311 Dordrecht, The Netherlands

<sup>8</sup> Department of Community Medicine, School of Medicine, Tehran University of Medical Sciences, Tehran 1416634793, Iran

<sup>9</sup> Graduate School for Health Sciences, University of Bern, 3012 Bern, Switzerland

<sup>10</sup> Department of Cardiology, University Hospital of Bern, University of Bern, 3012 Bern, Switzerland

<sup>11</sup> Swiss Paraplegic Research, 6207 Nottwil, Switzerland

---

## Contents

|                                                                                                                                                            |    |
|------------------------------------------------------------------------------------------------------------------------------------------------------------|----|
| Search Strategy .....                                                                                                                                      | 3  |
| Search strings.....                                                                                                                                        | 4  |
| EMBASE .....                                                                                                                                               | 4  |
| MEDLINE (Ovid) .....                                                                                                                                       | 6  |
| Web of Science .....                                                                                                                                       | 8  |
| Cochrane Central (Wiley).....                                                                                                                              | 10 |
| Google Scholar .....                                                                                                                                       | 12 |
| Effect of buckwheat products on a variety of cardiovascular risk markers.....                                                                              | 13 |
| Meta-analysis summary .....                                                                                                                                | 20 |
| Table S4. Sensitivity analysis of the meta-analysis of randomized clinical trials comparing buckwheat supplementation versus control on blood lipids ..... | 21 |
| Methodological quality assessment.....                                                                                                                     | 24 |
| Publication bias .....                                                                                                                                     | 25 |
| Sensitivity analysis of the meta-analysis on total cholesterol after removing the non-grain component study .....                                          | 28 |
| Table S5. Lipid profile markers at baseline.....                                                                                                           | 29 |
| Leave-one-out analysis.....                                                                                                                                | 30 |

## Search Strategy

**Table S1. Records identified in the search phase**

| Database searched                              | Source           | Timespan covered | Records     | Records after duplicates removed | Excluded records |
|------------------------------------------------|------------------|------------------|-------------|----------------------------------|------------------|
| EMBASE                                         | Embase.com       | 1971 - 2022      | 830         | 820                              | 10               |
| Medline ALL                                    | Ovid             | 1946 - 2022      | 593         | 129                              | 464              |
| Web of Science Core Collection*                | Web of Knowledge | 1975 - 2022      | 1419        | 842                              | 577              |
| Cochrane Central Register of Controlled Trials | Wiley            | 1992 - 2022      | 2           | 2                                | 0                |
| <b>Subtotal</b>                                |                  |                  | <b>2844</b> | <b>1793</b>                      | <b>1051</b>      |
| <i>Other sources: Google Scholar</i>           |                  |                  | 200         | 144                              | 56               |
| <b>Total</b>                                   |                  |                  | <b>3044</b> | <b>1937</b>                      | <b>1107</b>      |

---

## Search strings

### EMBASE

('lipid analysis'/exp OR (('marker'/exp/mj) AND ('lipid'/exp/mj)) OR 'cardiovascular risk factor'/de OR 'cardiovascular disease'/exp OR 'cardiometabolic disease'/de OR 'heart failure'/de OR 'congestive heart failure'/de OR 'heart disease'/de OR 'hypertensive heart disease'/de OR 'hypertensive heart failure'/de OR 'coronary artery disease'/de OR 'ischemic heart disease'/exp OR 'cerebrovascular accident'/de OR 'atherosclerotic cardiovascular disease'/de OR 'brain ischemia'/exp OR 'cardiovascular mortality'/de OR 'hypertension'/exp OR 'non insulin dependent diabetes mellitus'/exp OR 'insulin homeostasis'/de OR 'glucose homeostasis'/de OR 'insulin response'/exp OR 'glucose blood level'/exp OR 'insulin blood level'/exp OR 'hyperinsulinism'/exp OR 'hypoinsulinemia'/de OR 'impaired glucose tolerance'/de OR 'impaired fasting glucose'/de OR 'hyperglycemia'/de OR 'fasting glucose'/de OR 'glycosylated hemoglobin'/exp OR 'glycemic control'/de OR 'homa ir'/exp OR 'obesity'/exp OR 'body mass'/de OR 'body fat'/de OR 'adipose tissue'/exp OR 'waist circumference'/de OR 'waist hip ratio'/de OR 'peripheral circulation'/de OR 'abnormal blood pressure'/exp OR 'blood pressure'/exp OR (('vasoconstriction'/exp OR 'vasocongestion'/de OR 'vasodilator agent'/exp) AND ('enzyme activity'/de)) OR 'atherosclerosis'/de OR 'atherosclerotic plaque'/de OR 'carotid atherosclerosis'/de OR 'coronary artery atherosclerosis'/de OR 'arterial wall thickness'/de OR 'coronary artery calcification'/de OR 'endothelium'/exp OR 'endothelium cell'/exp OR 'endothelial function'/de OR 'endothelial dysfunction'/de OR 'inflammation'/exp OR 'oxidative stress'/de OR 'antioxidant'/exp OR 'body composition'/exp OR 'mortality'/exp OR 'nitric oxide'/de OR 'endothelium derived relaxing factor'/de OR 'endothelin 1'/de OR 'prostacyclin'/de OR 'intercellular adhesion molecule 1'/de OR 'vascular cell adhesion molecule 1'/de OR 'endothelial leukocyte adhesion molecule 1'/de OR 'PADGEM protein'/de OR 'arterial wall thickening'/de OR 'heart function'/exp OR 'pulse wave'/exp OR 'flow mediated dilatation'/de OR 'flow mediated dilation'/de OR 'peripheral arterial tonometry'/de OR 'echocardiography'/exp OR 'cardiovascular risk'/exp OR 'cardiometabolic risk'/de OR 'Metabolic Syndrome X'/de OR 'arterial stiffness'/de OR 'mortality'/exp OR 'cause of death'/de OR 'mortality risk'/de OR 'survival'/exp OR (hyperten\* OR ((high) NEAR/3 (blood\*) NEAR/3 (pressu\*)) OR ((high) NEAR/3 (bloodpressu\*)) OR ((cardiovascu\* OR cardio-vascu\* OR heart-diseas\*) NEAR/3 (risk\*)) OR ((cardiovascular OR cardio-vascular\* OR coronar\* OR cardia\* OR heart OR myocard\* OR cardiometab\* OR cardio-metab\* OR cardio-metabol\*) NEAR/3 (accident\* OR arrest\* OR insuff\* OR disease\* OR event\* OR infarct\* OR disorder\* OR function\* OR dysfunct\* OR disfunct\* OR health\* OR failure\*)) OR cvd OR cvds OR cardiopath\* OR cardio-path\* OR angina OR ((ischemi\* OR ischaemi\* OR fail\* OR attack\* OR insufficien\*) NEAR/3 (heart OR cardi\* OR myocard\*)) OR ((cerebrovascular\*) NEAR/3 (accident\* OR lesion\* OR vasculopathy\* OR vasculit\* OR failure\*)) OR cva OR stroke\* OR ((brain OR cerebral OR cerebro\* OR cerebrum\*) NEAR/3 (ischemi\* OR ischaemi\* OR insult\* OR accident\* OR arrest\* OR failure\* OR accident\*)) OR ((brain) NEAR/2 (attack\*)) OR ((diabet\* OR dm) NEAR/3 (type-2 OR type2 OR type-II OR non-insulin\* OR noninsulin\* OR adult-onset\* OR slow-onset\* OR maturity-onset\*)) OR T2DM OR dmt2 OR dm2 OR T2-DM OR dm-t2 OR dm-2 OR niddm OR nid-dm OR MODY OR ((lipid\* OR cholester\* OR triacylglycerol\* OR triglyceride\* OR HDL\* OR LDL\* OR VLDL\* OR VHDL\*) NEAR/6 (blood\* OR panel OR test\* OR profile\* OR serum OR plasma\* OR concentration\* OR level\* OR peroxidat\* OR autooxidat\* OR autoxidat\*)) OR ((glucose\* OR sugar OR insulin\*) NEAR/3 (level\* OR blood OR serum OR plasma\* OR concentration\* OR toleran\* OR sensitiv\* OR insensitiv\* OR resistan\* OR response\* OR dependen\* OR homeosta\* OR homoeosta\*)) OR hypoglycemi\* OR hypoglycaemi\* OR hyperglycemi\* OR hyperglycaemi\* OR antihyperglycemi\* OR prediabet\* OR pre-diabet\* OR fasting NEAR/2 glucose OR ((glycat\* OR glyco\*) NEAR/2 (hemoglob\* OR haemoglob\*)) OR HbA1c OR Hb-A1c OR hemoglobin-A1c OR haemoglobin-A1c OR HOMA-IR OR glycaem\* OR glycem\* OR glucosaemia

---

OR glucosemia OR hyperinsulin\* OR hypoinsulin\* OR insulinem\* OR insulinaem\* OR prediabet\* OR pre-diabet\* OR obes\* OR over-weight\* OR overweight OR adipos\* OR 'body mass' OR BMI OR ((abdom\* OR body) NEAR/3 (fat OR weight OR composition OR size)) OR ('weight gain\*') OR ('weight loss\*') OR (fat NEAR/3 (mass OR percentage\* OR distribution)) OR (waist NEAR/3 (hip OR circumference\*)) OR hypertensi\* OR hypotensi\* OR blood-pressure\* OR ((vasocon\* OR vasodil\*) NEAR/12 (enzyme\*)) OR ((endotheli\*) NEAR/3 (vasorelax\* OR relax\* OR sensit\* OR constrict\* OR contract\* OR adhes\*)) OR endothelin-1 OR prostaglandin-i2 OR PGI2 OR intercellular-adhesion-molecule-1 OR ICAM-1 OR CD54-antigen\* OR CD-54-antigen\* OR nitric-oxid\* OR genosyl OR nitrogen-mono\* OR noxivent OR vascular-cell-adhesion-molecule-1 OR VCAM-1 OR CD106-antigen\* OR CD-106-antigen\* OR endothelial-leukocyte-adhesion-molecule-1 OR e-selectin OR ELAM-1 OR selectin-e OR PADGEM-protein OR P-selectin OR selectin-P OR ((vascular OR aort\* OR arter\*) NEAR/2 (stiff\* OR wall OR thick\*)) OR ((ventricular OR ventricle OR heart) NEAR/3 (funct\* OR dysfunct\* OR rate)) OR ventricle-stroke-volum\* OR pulse-wave\* OR ((arterial\* OR artery) NEAR/3 (wave\* OR pulse\*)) OR flow-mediated-dilat\* OR peripheral-arterial-tonometr\* OR echocardiograph\* OR cardioechograph\* OR ((cardiac OR cardial OR heart) NEAR/3 (echograp\* OR scan\* OR echocard\*)) OR ((echo) NEAR/3 (cardiog\*)) OR ((cardiovascular\* OR cardio-vasc\* OR cardiac-vasc\* OR cardiometabol\* OR cardio-metabol\* OR metabol\*) NEAR/3 (risk\* OR syndrome\*)) OR CV-risk OR hypercholesterol\* OR atheroscler\* OR athero-scler\* OR ((arteriosclerotic\* OR arterio-sclerotic\*) NEAR/2 (plaque\*)) OR ((intima-media OR intimamedia) NEAR/3 thickness\*) OR ((arterial) NEAR/1 (wall\* OR thickness\*)) OR ((coronar\*) NEAR/3 (calcif\*)) OR endothel\* OR antioxid\* OR anti-oxid\* OR inflamma\* OR ((oxidat\*) NEAR/3 (stress\* OR damage\* OR injur\*)) OR ((body OR bodies) NEAR/3 (compos\* OR adipos\* OR distribut\* OR fat OR water OR cholest\* OR potas\*)) OR ((reactive) NEAR/3 (oxygen\*) NEAR/3 (metabolite\* OR species)) OR lipoperoxidat\* OR lipo-peroxidat\* OR isoprostan\* OR malonaldehyde\* OR lipoxygenase\* OR myeloperoxidase\* OR mortalit\* OR death\* OR fatalit\* OR survival\* OR die OR died OR passed-away\* OR dead):ab,ti,kw) AND ('fagopyrum'/exp OR (buckwheat\* OR buck-wheat\* OR fagopyrumesculent\* OR ((fagopyrum\* OR Polygonum\*) NEAR/3 (escul\* OR tatar\* OR tarar\* OR tartar\* OR spp OR tartica\*)) OR ((f) NEAR/2 (esculentum OR tataricum OR tartar OR tartarian OR tarticarium))):ab,ti,kw)

---

## MEDLINE (Ovid)

((exp \*Biomarkers"/) AND (exp \*Lipids"/)) OR exp "Heart Disease Risk Factors"/ OR exp "Cardiovascular Diseases"/ OR exp "Coronary Artery Disease"/ OR exp "Stroke"/ OR exp "Diabetes Mellitus, Type 2"/ OR exp "Hyperinsulinism"/ OR exp "Hyperglycemia"/ OR "Glycemic Control"/ OR exp "Overweight"/ OR exp "Adipose Tissue"/ OR exp "Waist Circumference"/ OR "Waist-Hip Ratio"/ OR exp "Blood Pressure"/ OR ((("Vasoconstriction"/ OR exp "Vasodilator Agents"/) AND (en.fs)) OR exp "Atherosclerosis"/ OR "Plaque, Atherosclerotic"/ OR exp "Endothelium"/ OR exp "Inflammation"/ OR exp "Oxidative Stress"/ OR exp "Antioxidants"/ OR exp "Body Composition"/ OR "Nitric Oxide"/ OR "Endothelium-Dependent Relaxing Factors"/ OR "Endothelin-1"/ OR "Intercellular Adhesion Molecule-1"/ OR "Vascular Cell Adhesion Molecule-1"/ OR "E-Selectin"/ OR "P-Selectin"/ OR "Pulse"/ OR exp "Pulse Wave Analysis"/ OR exp "Echocardiography"/ OR "Vascular Stiffness"/ OR exp "Mortality"/ OR mo.fs OR "Survival"/ OR (hyperten\* OR ((high) ADJ3 (blood\*) ADJ3 (pressu\*)) OR ((high) ADJ3 (bloodpressu\*)) OR ((cardiovascu\* OR cardio-vascu\* OR heart-diseas\*) ADJ3 (risk\*)) OR ((cardiovascular OR cardio-vascular\* OR coronar\* OR cardia\* OR heart OR myocard\* OR cardiometab\* OR cardio-metab\* OR cardio-metabol\*) ADJ3 (accident\* OR arrest\* OR insuff\* OR disease\* OR event\* OR infarct\* OR disorder\* OR function\* OR dysfunct\* OR disfunct\* OR health\* OR failure\*)) OR cvd OR cvds OR cardiopath\* OR cardio-path\* OR angina OR ((ischemi\* OR ischaemi\* OR fail\* OR attack\* OR insufficien\*) ADJ3 (heart OR cardi\* OR myocard\*)) OR ((cerebrovascular\*) ADJ3 (accident\* OR lesion\* OR vasculopathy\* OR vasculit\* OR failure\*)) OR cva OR stroke\* OR ((brain OR cerebral OR cerebro\* OR cerebrum\*) ADJ3 (ischemi\* OR ischaemi\* OR insult\* OR accident\* OR arrest\* OR failure\* OR accident\*)) OR ((brain) ADJ2 (attack\*)) OR ((diabet\* OR dm) ADJ3 (type-2 OR type2 OR type-II OR non-insulin\* OR noninsulin\* OR adult-onset\* OR slow-onset\* OR maturity-onset\*)) OR T2DM OR dmt2 OR dm2 OR T2-DM OR dm-t2 OR dm-2 OR niddm OR nid-dm OR MODY OR ((lipid\* OR cholester\* OR triacylglycerol\* OR triglyceride\* OR HDL\* OR LDL\* OR VLDL\* OR VHDL\*) ADJ6 (blood\* OR panel OR test\* OR profile\* OR serum OR plasma\* OR concentration\* OR level\* OR peroxidat\* OR autooxidat\* OR autooxidat\*)) OR ((glucose\* OR sugar OR insulin\*) ADJ3 (level\* OR blood OR serum OR plasma\* OR concentration\* OR toleran\* OR sensitiv\* OR insensitiv\* OR resistan\* OR response\* OR dependen\* OR homeosta\* OR homoeosta\*)) OR hypoglycemi\* OR hypoglycaemi\* OR hyperglycemi\* OR hyperglycaemi\* OR antihyperglycemi\* OR prediabet\* OR pre-diabet\* OR fasting ADJ2 glucose OR ((glycat\* OR glyco\*) ADJ2 (hemoglob\* OR haemoglob\*)) OR HbA1c OR Hb-A1c OR hemoglobin-A1c OR haemoglobin-A1c OR HOMA-IR OR glycaem\* OR glycem\* OR glucosaemia OR glucosemia OR hyperinsulin\* OR hypoinsulin\* OR insulinem\* OR insulinaem\* OR prediabet\* OR pre-diabet\* OR obes\* OR over-weight\* OR overweight OR adipos\* OR 'body mass' OR BMI OR ((abdom\* OR body) ADJ3 (fat OR weight OR composition OR size)) OR ('weight gain\*') OR ('weight loss\*') OR (fat ADJ3 (mass OR percentage\* OR distribution)) OR (waist ADJ3 (hip OR circumference\*)) OR hypertensi\* OR hypotensi\* OR blood-pressure\* OR ((vasocon\* OR vasodil\*) ADJ12 (enzyme\*)) OR ((endotheli\*) ADJ3 (vasorelax\* OR relax\* OR sensit\* OR constrict\* OR contract\* OR adhes\*)) OR endothelin-1 OR prostaglandin-i2 OR PGI2 OR intercellular-adhesion-molecule-1 OR ICAM-1 OR CD54-antigen\* OR CD-54-antigen\* OR nitric-oxid\* OR genosyl OR nitrogen-mono\* OR noxivent OR vascular-cell-adhesion-molecule-1 OR VCAM-1 OR CD106-antigen\* OR CD-106-antigen\* OR endothelial-leukocyte-adhesion-molecule-1 OR e-selectin OR ELAM-1 OR selectin-e OR PADGEM-protein OR P-selectin OR selectin-P OR ((vascular OR aort\* OR arter\*) ADJ2 (stiff\* OR wall OR thick\*)) OR ((ventricular OR ventricle OR heart) ADJ3 (funct\* OR dysfunct\* OR rate)) OR ventricle-stroke-volum\* OR pulse-wave\* OR ((arterial\* OR artery) ADJ3 (wave\* OR pulse\*)) OR flow-mediated-dilat\* OR peripheral-arterial-tonometr\* OR echocardiograph\* OR cardioechograph\* OR ((cardiac OR cardial OR heart) ADJ3 (echograp\* OR scan\* OR echocard\*)) OR ((echo) ADJ3 (cardiog\*)) OR ((cardiovascular\* OR cardio-vasc\* OR cardiac-vasc\* OR cardiometabol\* OR cardio-metabol\* OR metabol\*) ADJ3 (risk\* OR syndrome\*)) OR CV-risk OR

---

hypercholesterol\* OR atheroscler\* OR athero-scler\* OR ((arteriosclerotic\* OR arterio-sclerotic\*) ADJ2 (plaque\*)) OR ((intima-media OR intimamedia) ADJ3 thickness\*) OR ((arterial) ADJ1 (wall\* OR thickness\*)) OR ((coronar\*) ADJ3 (calcif\*)) OR endothel\* OR antioxid\* OR anti-oxid\* OR inflamma\* OR ((oxidat\*) ADJ3 (stress\* OR damage\* OR injur\*)) OR ((body OR bodies) ADJ3 (compos\* OR adipos\* OR distribut\* OR fat OR water OR cholest\* OR potas\*)) OR ((reactive) ADJ3 (oxygen\*) ADJ3 (metabolite\* OR species)) OR lipoperoxidat\* OR lipo-peroxidat\* OR isoprostan\* OR malonaldehyde\* OR lipoxygenase\* OR myeloperoxidase\* OR mortalit\* OR death\* OR fatalit\* OR survival\* OR die OR died OR passed-away\* OR dead).ab,ti,kf.) **AND** ("Fagopyrum"/ OR (buckwheat\* OR buck-wheat\* OR fagopyrumesculent\* OR ((fagopyrum\* OR Polygonum\*) ADJ3 (escul\* OR tatar\* OR tarar\* OR tartar\* OR spp OR tartica\*)) OR ((f) ADJ2 (esculentum OR tataricum OR tartar OR tartarian OR tarticarium))))).ab,ti,kf.)

---

## Web of Science

TS=((hyperten\* OR ((high) NEAR/2 (blood\*) NEAR/2 (pressu\*)) OR ((high) NEAR/2 (bloodpressu\*)) OR ((cardiovascu\* OR cardio-vascu\* OR heart-diseas\*) NEAR/2 (risk\*)) OR ((cardiovascular OR cardio-vascular\* OR coronar\* OR cardia\* OR heart OR myocard\* OR cardiometab\* OR cardio-metab\* OR cardio-metabol\*) NEAR/2 (accident\* OR arrest\* OR insuff\* OR disease\* OR event\* OR infarct\* OR disorder\* OR function\* OR dysfunct\* OR disfunct\* OR health\* OR failure\*)) OR cvd OR cvds OR cardiopath\* OR cardio-path\* OR angina OR ((ischemi\* OR ischaemi\* OR fail\* OR attack\* OR insufficien\*) NEAR/2 (heart OR cardi\* OR myocard\*)) OR ((cerebrovascular\*) NEAR/2 (accident\* OR lesion\* OR vasculopathy\* OR vasculit\* OR failure\*)) OR cva OR stroke\* OR ((brain OR cerebral OR cerebro\* OR cerebrum\*) NEAR/2 (ischemi\* OR ischaemi\* OR insult\* OR accident\* OR arrest\* OR failure\* OR accident\*)) OR ((brain) NEAR/2 (attack\*)) OR ((diabet\* OR dm) NEAR/2 (type-2 OR type2 OR type-II OR non-insulin\* OR noninsulin\* OR adult-onset\* OR slow-onset\* OR maturity-onset\*)) OR T2DM OR dmt2 OR dm2 OR T2-DM OR dm-t2 OR dm-2 OR niddm OR nid-dm OR MODY OR ((lipid\* OR cholester\* OR triacylglycerol\* OR triglyceride\* OR HDL\* OR LDL\* OR VLDL\* OR VHDL\*) NEAR/5 (blood\* OR panel OR test\* OR profile\* OR serum OR plasma\* OR concentration\* OR level\* OR peroxidat\* OR autooxidat\* OR autoxidat\*)) OR ((glucose\* OR sugar OR insulin\*) NEAR/2 (level\* OR blood OR serum OR plasma\* OR concentration\* OR toleran\* OR sensitiv\* OR insensitiv\* OR resistan\* OR response\* OR dependen\* OR homeosta\* OR homoeosta\*)) OR hypoglycemi\* OR hypoglycaemi\* OR hyperglycemi\* OR hyperglycaemi\* OR antihyperglycemi\* OR prediabet\* OR pre-diabet\* OR fasting NEAR/2 glucose OR ((glycat\* OR glyco\*) NEAR/2 (hemoglob\* OR haemoglob\*)) OR HbA1c OR Hb-A1c OR hemoglobin-A1c OR haemoglobin-A1c OR HOMA-IR OR glycaem\* OR glycem\* OR glucosaemia OR glucosemia OR hyperinsulin\* OR hypoinsulin\* OR insulinem\* OR insulinaem\* OR prediabet\* OR pre-diabet\* OR obes\* OR over-weight\* OR overweight OR adipos\* OR "body mass" OR BMI OR ((abdom\* OR body) NEAR/2 (fat OR weight OR composition OR size)) OR ("weight gain") OR ("weight loss") OR (fat NEAR/2 (mass OR percentage\* OR distribution)) OR (waist NEAR/2 (hip OR circumference\*)) OR hypertensi\* OR hypotensi\* OR blood-pressure\* OR ((vasocon\* OR vasodil\*) NEAR/12 (enzyme\*)) OR ((endotheli\*) NEAR/2 (vasorelax\* OR relax\* OR sensit\* OR constrict\* OR contract\* OR adhes\*)) OR endothelin-1 OR prostaglandin-i2 OR PGI2 OR intercellular-adhesion-molecule-1 OR ICAM-1 OR CD54-antigen\* OR CD-54-antigen\* OR nitric-oxid\* OR genosyl OR nitrogen-mono\* OR noxivent OR vascular-cell-adhesion-molecule-1 OR VCAM-1 OR CD106-antigen\* OR CD-106-antigen\* OR endothelial-leukocyte-adhesion-molecule-1 OR e-selectin OR ELAM-1 OR selectin-e OR PADGEM-protein OR P-selectin OR selectin-P OR ((vascular OR aort\* OR arter\*) NEAR/2 (stiff\* OR wall OR thick\*)) OR ((ventricular OR ventricle OR heart) NEAR/2 (funct\* OR dysfunct\* OR rate)) OR ventricle-stroke-volum\* OR pulse-wave\* OR ((arterial\* OR artery) NEAR/2 (wave\* OR pulse\*)) OR flow-mediated-dilat\* OR peripheral-arterial-tonometr\* OR echocardiograph\* OR cardioechograph\* OR ((cardiac OR cardial OR heart) NEAR/2 (echograp\* OR scan\* OR echocard\*)) OR ((echo) NEAR/2 (cardiog\*)) OR ((cardiovascular\* OR cardio-vasc\* OR cardiac-vasc\* OR cardiometabol\* OR cardio-metabol\* OR metabol\*) NEAR/2 (risk\* OR syndrome\*)) OR CV-risk OR hypercholesterol\* OR atheroscler\* OR athero-scler\* OR ((arteriosclerotic\* OR arterio-sclerotic\*) NEAR/2 (plaque\*)) OR ((intima-media OR intimamedia) NEAR/2 thickness\*) OR ((arterial) NEAR/1 (wall\* OR thickness\*)) OR ((coronar\*) NEAR/2 (calcif\*)) OR endothel\* OR antioxid\* OR anti-oxid\* OR inflamma\* OR ((oxidat\*) NEAR/2 (stress\* OR damage\* OR injur\*)) OR ((body OR bodies) NEAR/2 (compos\* OR adipos\* OR distribut\* OR fat OR water OR cholest\* OR potas\*)) OR ((reactive) NEAR/2 (oxygen\*) NEAR/2 (metabolite\* OR species)) OR lipoperoxidat\* OR lipo-peroxidat\* OR isoprostan\* OR malonaldehyde\* OR lipoxygenase\* OR myeloperoxidase\* OR mortalit\* OR death\* OR fatalit\* OR survival\* OR die OR died OR passed-away\* OR dead)) AND ((buckwheat\* OR buck-wheat\* OR fagopyrumesculent\* OR



---

((fagopyrum\* OR Polygonum\*) NEAR/2 (escul\* OR tatar\* OR tarar\* OR tartar\* OR spp OR tartica\*)) OR  
((f) NEAR/2 (esculentum OR tataricum OR tartar OR tartarian OR tarticarium))))

((hyperten\* OR ((high) NEAR/3 (blood\*) NEAR/3 (pressu\*)) OR ((high) NEAR/3 (bloodpressu\*)) OR ((cardiovascu\* OR cardio NEXT vascu\* OR heart NEXT diseas\*) NEAR/3 (risk\*)) OR ((cardiovascular OR cardio NEXT vascular\* OR coronar\* OR cardia\* OR heart OR myocard\* OR cardiometab\* OR cardio NEXT metab\* OR cardio NEXT metabol\*) NEAR/3 (accident\* OR arrest\* OR insuff\* OR disease\* OR event\* OR infarct\* OR disorder\* OR function\* OR dysfunct\* OR disfunct\* OR health\* OR failure\*)) OR cvd OR cvds OR cardiopath\* OR cardio NEXT path\* OR angina OR ((ischemi\* OR ischaemi\* OR fail\* OR attack\* OR insufficien\*) NEAR/3 (heart OR cardi\* OR myocard\*)) OR ((cerebrovascular\*) NEAR/3 (accident\* OR lesion\* OR vasculopathy\* OR vasculit\* OR failure\*)) OR cva OR stroke\* OR ((brain OR cerebral OR cerebro\* OR cerebrum\*) NEAR/3 (ischemi\* OR ischaemi\* OR insult\* OR accident\* OR arrest\* OR failure\* OR accident\*)) OR ((brain) NEAR/2 (attack\*)) OR ((diabet\* OR dm) NEAR/3 (type NEXT 2 OR type2 OR type NEXT II OR non NEXT insulin\* OR noninsulin\* OR adult NEXT onset\* OR slow NEXT onset\* OR maturity NEXT onset\*)) OR T2DM OR dmt2 OR dm2 OR T2 NEXT DM OR dm NEXT t2 OR dm NEXT 2 OR niddm OR nid NEXT dm OR MODY OR ((lipid\* OR cholester\* OR triacylglycerol\* OR triglyceride\* OR HDL\* OR LDL\* OR VLDL\* OR VHDL\*) NEAR/6 (blood\* OR panel OR test\* OR profile\* OR serum OR plasma\* OR concentration\* OR level\* OR peroxidat\* OR autooxidat\* OR autooxidat\*)) OR ((glucose\* OR sugar OR insulin\*) NEAR/3 (level\* OR blood OR serum OR plasma\* OR concentration\* OR toleran\* OR sensitiv\* OR insensitiv\* OR resistan\* OR response\* OR dependen\* OR homeosta\* OR homoeosta\*)) OR hypoglycemi\* OR hypoglycaemi\* OR hyperglycemi\* OR hyperglycaemi\* OR antihyperglycemi\* OR prediabet\* OR pre NEXT diabet\* OR fasting NEAR/2 glucose OR ((glycat\* OR glyco\*) NEAR/2 (hemoglob\* OR haemoglob\*)) OR HbA1c OR Hb NEXT A1c OR hemoglobin NEXT A1c OR haemoglobin NEXT A1c OR HOMA NEXT IR OR glycaem\* OR glycem\* OR glucosaemia OR glucosemia OR hyperinsulin\* OR hypoinsulin\* OR insulinem\* OR insulinaem\* OR prediabet\* OR pre NEXT diabet\* OR obes\* OR over NEXT weight\* OR overweight OR adipos\* OR 'body mass' OR BMI OR ((abdom\* OR body) NEAR/3 (fat OR weight OR composition OR size)) OR ('weight gain\*') OR ('weight loss\*') OR (fat NEAR/3 (mass OR percentage\* OR distribution)) OR (waist NEAR/3 (hip OR circumference\*)) OR hypertensi\* OR hypotensi\* OR blood NEXT pressure\* OR ((vasocon\* OR vasodil\*) NEAR/12 (enzyme\*)) OR ((endotheli\*) NEAR/3 (vasorelax\* OR relax\* OR sensit\* OR constrict\* OR contract\* OR adhes\*)) OR endothelin NEXT 1 OR prostaglandin NEXT i2 OR PGI2 OR intercellular NEXT adhesion NEXT molecule NEXT 1 OR ICAM NEXT 1 OR CD54 NEXT antigen\* OR CD NEXT 54 NEXT antigen\* OR nitric NEXT oxid\* OR genosyl OR nitrogen NEXT mono\* OR noxivent OR vascular NEXT cell NEXT adhesion NEXT molecule NEXT 1 OR VCAM NEXT 1 OR CD106 NEXT antigen\* OR CD NEXT 106 NEXT antigen\* OR endothelial NEXT leukocyte NEXT adhesion NEXT molecule NEXT 1 OR e NEXT selectin OR ELAM NEXT 1 OR selectin NEXT e OR PADGEM NEXT protein OR P NEXT selectin OR selectin NEXT P OR ((vascular OR aort\* OR arter\*) NEAR/2 (stiff\* OR wall OR thick\*)) OR ((ventricular OR ventricle OR heart) NEAR/3 (funct\* OR dysfunct\* OR rate)) OR ventricle NEXT stroke NEXT volum\* OR pulse NEXT wave\* OR ((arterial\* OR artery) NEAR/3 (wave\* OR pulse\*)) OR flow NEXT mediated NEXT dilat\* OR peripheral NEXT arterial NEXT tonometr\* OR echocardiograph\* OR cardioechograph\* OR ((cardiac OR cardial OR heart) NEAR/3 (echograp\* OR scan\* OR echocard\*)) OR ((echo) NEAR/3 (cardiog\*)) OR ((cardiovascular\* OR cardio NEXT vasc\* OR cardiac NEXT vasc\* OR cardiometabol\* OR cardio NEXT metabol\* OR metabol\*) NEAR/3 (risk\* OR syndrome\*)) OR CV NEXT risk OR hypercholesterol\* OR atheroscler\* OR athero NEXT scler\* OR ((arteriosclerotic\* OR arterio NEXT sclerotic\*) NEAR/2 (plaque\*)) OR ((intima NEXT media OR intimamedia) NEAR/3 thickness\*) OR ((arterial) NEAR/1 (wall\* OR thickness\*)) OR ((coronar\*) NEAR/3 (calcif\*)) OR endothel\* OR antioxid\* OR anti NEXT oxid\* OR inflamma\* OR ((oxidat\*) NEAR/3 (stress\* OR damage\* OR injur\*)) OR ((body OR bodies) NEAR/3 (compos\* OR adipos\* OR distribut\* OR fat OR water OR cholest\* OR potas\*)) OR ((reactive) NEAR/3 (oxygen\*) NEAR/3 (metabolite\* OR species)) OR lipoperoxidat\* OR lipo

---

NEXT peroxidat\* OR isoprostan\* OR malonaldehyde\* OR lipoxygenase\* OR myeloperoxidase\* OR mortalit\* OR death\* OR fatalit\* OR survival\* OR die OR died OR passed NEXT away\* OR dead):ab,ti,kw) **AND** ((buckwheat\* OR buck NEXT wheat\* OR fagopyrumesculent\* OR ((fagopyrum\* OR Polygonum\*) NEAR/3 (escul\* OR tatar\* OR tarar\* OR tartar\* OR spp OR tartica\*)) OR ((f) NEAR/2 (esculentum OR tataricum OR tartar OR tartarian OR tarticarium))):ab,ti,kw)

---

## Google Scholar

Buckwheat | buck-wheat | fagopyrumesculent | "fagopyrum esculentum" cardiovascular | cardiometabolic | diabetes | lipid | glucose | obesity | "blood pressure" | Atherosclerosis | inflammation | "oxidative stress" | moratlity | survival | insulin | BMI | "body fat | mass"

# Effect of buckwheat products on a variety of cardiovascular risk markers

Table S2. Human interventional and randomized controlled studies describing the effect of buckwheat intake on CVD risk markers

| Study (year)<br>[ref.]                          | Intervention<br>(N)/control (n) | Duration<br>(weeks) | Intervention<br>type | Intervention<br>dose                                                                                                | Control                          | Health<br>Status      | Age<br>(years)* | CVD<br>risk marker | Effect in<br>intervention<br>arm | Difference<br>between arms<br>(95%CI) + |
|-------------------------------------------------|---------------------------------|---------------------|----------------------|---------------------------------------------------------------------------------------------------------------------|----------------------------------|-----------------------|-----------------|--------------------|----------------------------------|-----------------------------------------|
| Archimowicz-<br>Cyrylowska et al.<br>(1996) [1] | 20/40                           | 12                  | BW herb mixture      | <i>Ad libitum</i>                                                                                                   | Troxerutin and<br>Ruscus mixture | T2D                   | 20-75           | Glucose            | ↓↓                               | -0.35(-1.54;0.84)                       |
|                                                 |                                 |                     |                      |                                                                                                                     |                                  |                       |                 | HbA1c              | ↓↓                               | <b>0.58(0.45;0.70)</b>                  |
|                                                 |                                 |                     |                      |                                                                                                                     |                                  |                       |                 | HDL                | ↑↑                               | 0.14(-0.33;0.62)                        |
|                                                 |                                 |                     |                      |                                                                                                                     |                                  |                       |                 | TC                 | ↓↓                               | 0.30(-0.20;0.80)                        |
|                                                 |                                 |                     |                      |                                                                                                                     |                                  |                       |                 | TG                 | ↓↓                               | 0.19(-0.08;0.46)                        |
| Bijlani (1984) [2]                              | 7/5                             | 4                   | Sieved BW flour      | 100 g                                                                                                               | Lunch cereal intake              | Healthy               | 19-22           | HDL                | ↑↑                               | <b>-0.28(-0.51;-0.06)</b>               |
|                                                 |                                 |                     |                      |                                                                                                                     |                                  |                       |                 | LDL                | ↑                                | -0.05(-0.28;0.18)                       |
|                                                 |                                 |                     |                      |                                                                                                                     |                                  |                       |                 | TC                 | ↑                                | -0.13(-0.73;0.48)                       |
|                                                 |                                 |                     |                      |                                                                                                                     |                                  |                       |                 | Glucose            | ↑                                | -0.05(-0.13;0.02)                       |
|                                                 |                                 |                     |                      |                                                                                                                     |                                  |                       |                 | vLDL               | ↓                                | -0.20(-0.49;0.09)                       |
| Bijlani (1985) [3]                              | 8/9                             | 12                  | Whole BW flour       | 100 g                                                                                                               | Breakfast cereal                 | Healthy               | 19-34           | Glucose            | ↓↓                               | <b>15.5(10.9;20.1)</b>                  |
|                                                 |                                 |                     |                      |                                                                                                                     |                                  |                       |                 | HDL                | ↑↑                               | 0.003(-0.17;0.18)                       |
|                                                 |                                 |                     |                      |                                                                                                                     |                                  |                       |                 | LDL                | ↑                                | <b>-0.83(-1.34;-0.32)</b>               |
|                                                 |                                 |                     |                      |                                                                                                                     |                                  |                       |                 | TC                 | ↓                                | -0.06(-0.53;0.41)                       |
|                                                 |                                 |                     |                      |                                                                                                                     |                                  |                       |                 | TG                 | ↓                                | <b>0.31(0.11;0.502)</b>                 |
| Dinu et al. (2017) [4]                          | 10/9                            | 6                   | BW-enriched<br>foods | 80 g of 100% BW<br>pasta and BW-<br>rich products: 60<br>g of tacks, 40 g<br>biscuits and 50 g<br>of flakes (daily) | Usual gluten-free diet           | Gluten<br>sensitivity | 44              | vLDL               | ↓                                | <b>-1.39(-0.94;-0.19)</b>               |
|                                                 |                                 |                     |                      |                                                                                                                     |                                  |                       |                 | Glucose            | ↑                                | <b>0.33(0.26;0.40)</b>                  |
|                                                 |                                 |                     |                      |                                                                                                                     |                                  |                       |                 | HDL                | ↓                                | <b>0.13(0.07;0.19)</b>                  |
|                                                 |                                 |                     |                      |                                                                                                                     |                                  |                       |                 | IFN-γ              | ↓                                | -4.80(-15.51;5.91)                      |
|                                                 |                                 |                     |                      |                                                                                                                     |                                  |                       |                 | IL-10              | ↑                                | 2.40(-0.72;5.52)                        |
|                                                 |                                 |                     |                      |                                                                                                                     |                                  |                       |                 | IL-12              | ↓                                | <b>-1.50(-2.33;-0.67)</b>               |
|                                                 |                                 |                     |                      |                                                                                                                     |                                  |                       |                 | IL-1ra             | ↑                                | -2.50(-6.04;1.04)                       |
|                                                 |                                 |                     |                      |                                                                                                                     |                                  |                       |                 | IL-4               | ↓                                | <b>-0.03(-0.06;0.004)</b>               |
|                                                 |                                 |                     |                      |                                                                                                                     |                                  |                       |                 | IL-6               | ↓                                | -0.70 (-2.03;0.63)                      |

| Study (year)<br>[ref.]         | Intervention<br>(N)/control (n) | Duration<br>(weeks) | Intervention<br>type              | Intervention<br>dose                                | Control                                        | Health<br>Status | Age<br>(years)* | CVD<br>risk marker   | Effect in<br>intervention<br>arm | Difference<br>between arms<br>(95%CI) <sup>+</sup> |
|--------------------------------|---------------------------------|---------------------|-----------------------------------|-----------------------------------------------------|------------------------------------------------|------------------|-----------------|----------------------|----------------------------------|----------------------------------------------------|
|                                |                                 |                     |                                   |                                                     |                                                |                  |                 | IL-8                 | ↓                                | 7.50(-4.11;19.11)                                  |
|                                |                                 |                     |                                   |                                                     |                                                |                  |                 | LDL                  | ↑                                | 0.00(-0.76;0.76)                                   |
|                                |                                 |                     |                                   |                                                     |                                                |                  |                 | MCP-1                | ↓↓                               | -11.10(-23.56;1.36)                                |
|                                |                                 |                     |                                   |                                                     |                                                |                  |                 | TNFα                 | ↓                                | 0.10(-0.33;0.53)                                   |
|                                |                                 |                     |                                   |                                                     |                                                |                  |                 | TC                   | ↓                                | <b>0.26(0.15;0.36)</b>                             |
|                                |                                 |                     |                                   |                                                     |                                                |                  |                 | TG                   | ↓                                | -0.09(-0.19;0.01)                                  |
|                                |                                 |                     |                                   |                                                     |                                                |                  |                 | VEGF                 | ↓                                | -0.70(-47.36;45.96)                                |
| Huang et al. (2009) [5]        | 35/35                           | 8                   | Tatary BW<br>mixture              | Not stated                                          | Control drug                                   | T2D              | 53              | Glucose              | ↓↓                               | <b>-2.69(-3.14;-2.24)</b>                          |
|                                |                                 |                     |                                   |                                                     |                                                |                  |                 | HbA1c                | ↓↓                               | <b>-2.15(-2.24;-2.06)</b>                          |
|                                |                                 |                     |                                   |                                                     |                                                |                  |                 | HDL                  | ↓↓                               | <b>-1.91(-1.95;-1.87)</b>                          |
|                                |                                 |                     |                                   |                                                     |                                                |                  |                 | LDL                  | ↓↓                               | <b>-0.70(-0.73;-0.67)</b>                          |
|                                |                                 |                     |                                   |                                                     |                                                |                  |                 | TC                   | ↓↓                               | <b>-1.22(-1.29;-1.15)</b>                          |
|                                |                                 |                     |                                   |                                                     |                                                |                  |                 | TG                   | ↓↓                               | <b>-1.68(-1.80;-1.56)</b>                          |
|                                |                                 |                     |                                   |                                                     |                                                |                  |                 | Adiponectin          | ↑↑                               | <b>4.10(3.13;5.07)</b>                             |
| Mišan et al. (2017) [6]        | 12/22                           | 5                   | BW-enriched<br>instant porridge   | 80 g                                                | 80g maize instant<br>porridge                  | HC subjects      | 56              | CRP                  | ↓                                | <b>-0.80(-1.16;-0.439)</b>                         |
|                                |                                 |                     |                                   |                                                     |                                                |                  |                 | Fat mass             | ↓                                | -0.15(-2.91;2.61)                                  |
|                                |                                 |                     |                                   |                                                     |                                                |                  |                 | Glucose              | ↓                                | -0.04(-0.22;0.15)                                  |
|                                |                                 |                     |                                   |                                                     |                                                |                  |                 | HDL                  | ↑↑                               | -0.07(-0.18;0.04)                                  |
|                                |                                 |                     |                                   |                                                     |                                                |                  |                 | LDL                  | ↓↓                               | 0.42(0.17;0.67)                                    |
|                                |                                 |                     |                                   |                                                     |                                                |                  |                 | TC                   | ↓↓                               | 0.49(0.14;0.85)                                    |
|                                |                                 |                     |                                   |                                                     |                                                |                  |                 | TG                   | ↓↓                               | 0.13(-0.10;0.36)                                   |
|                                |                                 |                     |                                   |                                                     |                                                |                  |                 | Weight               | ↑                                | 0.10(-0.32;0.52)                                   |
| Nishimura et al. (2016)<br>[7] | 73/71                           | 12                  | Rutin-rich<br>Tartary BW<br>foods | Tartary BW<br>noodles (80g)<br>and cookies<br>(50g) | Wheat-based noodles<br>(80g) and cookies (50g) | Healthy          | 54.1            | Atherogenic<br>index | ↓                                | <b>0.05(0.05;0.06)</b>                             |
|                                |                                 |                     |                                   |                                                     |                                                |                  |                 | BMI                  | ↓                                | 0.10(-0.56;0.76)                                   |
|                                |                                 |                     |                                   |                                                     |                                                |                  |                 | BF                   | ↓                                | -0.26(-0.31;-0.21)                                 |
|                                |                                 |                     |                                   |                                                     |                                                |                  |                 | DBP                  | ↑                                | 0.15(-2.26;2.56)                                   |

| Study (year)<br>[ref.]    | Intervention<br>(N)/control (n) | Duration<br>(weeks) | Intervention<br>type                                     | Intervention<br>dose                  | Control             | Health<br>Status            | Age<br>(years)* | CVD<br>risk marker | Effect in<br>intervention<br>arm | Difference<br>between arms<br>(95%CI) <sup>+</sup> |
|---------------------------|---------------------------------|---------------------|----------------------------------------------------------|---------------------------------------|---------------------|-----------------------------|-----------------|--------------------|----------------------------------|----------------------------------------------------|
| Qiu et al. (2016) (a) [8] | 52/52                           | 4                   | Tartary BW<br>foods                                      | Not stated                            | Diet plan/education | T2D                         | 58.8            | HDL                | ↓                                | 0.04(-0.05;0.13)                                   |
|                           |                                 |                     |                                                          |                                       |                     |                             |                 | LDL                | ↓                                | 0.05(-0.19;0.29)                                   |
|                           |                                 |                     |                                                          |                                       |                     |                             |                 | oxLDL              | ↓                                | <b>-2.160(-4.31;-0.01)</b>                         |
|                           |                                 |                     |                                                          |                                       |                     |                             |                 | SBP                | ↓                                | 0.98(-2.23;4.19)                                   |
|                           |                                 |                     |                                                          |                                       |                     |                             |                 | TBARS              | ↑                                | <b>-0.98(-0.76;-0.68)</b>                          |
|                           |                                 |                     |                                                          |                                       |                     |                             |                 | TC                 | ↓                                | -0.02(-0.21;0.17)                                  |
|                           |                                 |                     |                                                          |                                       |                     |                             |                 | TG                 | ↑                                | -0.12(-0.24;0.01)                                  |
|                           |                                 |                     |                                                          |                                       |                     |                             |                 | Weight             | ↓                                | 0.24(-1.97;2.45)                                   |
| Qiu et al. (2016) (b) [9] | 80/85                           | 4                   | Tartary BW<br>foods (e.g.,<br>kernel, noodle,<br>powder) | <i>Ad libitum</i>                     | Refined grains      | T2D                         | 56.9            | DBP                | ↓                                | -1.23(-3.91;1.45)                                  |
|                           |                                 |                     |                                                          |                                       |                     |                             |                 | SBP                | ↑                                | 2.35(-1.15;5.85)                                   |
|                           |                                 |                     |                                                          |                                       |                     |                             |                 | BMI                | ↓                                | 0.01(-0.61;0.63)                                   |
|                           |                                 |                     |                                                          |                                       |                     |                             |                 | Glucose            | ↓                                | 0.35(-0.20;0.90)                                   |
|                           |                                 |                     |                                                          |                                       |                     |                             |                 | HbA1c              | ↓                                | <b>-0.14(-0.17;-0.11)</b>                          |
|                           |                                 |                     |                                                          |                                       |                     |                             |                 | HDL                | ↓                                | 0.01(-0.04;0.06)                                   |
|                           |                                 |                     |                                                          |                                       |                     |                             |                 | HOMA-IR            | ↓                                | <b>-0.40;-0.60;-0.21)</b>                          |
|                           |                                 |                     |                                                          |                                       |                     |                             |                 | Insulin            | ↓↓                               | <b>-1.29(-1.67;-0.91)</b>                          |
| Shakib et al. (2011)[10]  | 20/NA                           | 6                   | BW-yoghurt<br>mixture                                    | 30 g BW seeds<br>and 160 g<br>yoghurt | No control          | HC and<br>NIDDM<br>patients | 30-50           | LDL                | ↓↓                               | <b>0.21(0.04;0.38)</b>                             |
|                           |                                 |                     |                                                          |                                       |                     |                             |                 | TC                 | ↓↓                               | 0.21(-0.01;0.43)                                   |
|                           |                                 |                     |                                                          |                                       |                     |                             |                 | TG                 | ↓                                | -0.06(-0.35;0.23)                                  |
|                           |                                 |                     |                                                          |                                       |                     |                             |                 | Weight             | ↓                                | 0.11(-1.78;2.00)                                   |
|                           |                                 |                     |                                                          |                                       |                     |                             |                 | Glucose            | ↓↓                               | <b>5.55(5.13;5.96)</b>                             |
|                           |                                 |                     |                                                          |                                       |                     |                             |                 | HDL                | ↑↑                               | <b>-0.09(-0.10;-0.08)</b>                          |
|                           |                                 |                     |                                                          |                                       |                     |                             |                 | LDL                | ↓↓                               | <b>0.61(0.58;0.64)</b>                             |
|                           |                                 |                     |                                                          |                                       |                     |                             |                 | TC                 | ↓↓                               | <b>1.87(1.85;1.89)</b>                             |
| Sofi et al. (2016) [11]   | 10/11                           | 8                   | BW-enriched<br>foods                                     | 500 g /week of<br>pasta, 1 kg/week    |                     | At risk for<br>CVDs         | 51.3            | TG                 | ↓↓                               | <b>0.82(0.81;0.83)</b>                             |
|                           |                                 |                     |                                                          |                                       |                     |                             |                 | Glucose            | ↓↓                               | 0.10(-0.18;0.38)                                   |
|                           |                                 |                     |                                                          |                                       |                     |                             |                 | HDL                | ↓↓                               | 0.08(-0.27;0.43)                                   |

| Study (year)<br>[ref.]    | Intervention<br>(N)/control (n) | Duration<br>(weeks) | Intervention<br>type | Intervention<br>dose                                                     | Control           | Health<br>Status | Age<br>(years)* | CVD<br>risk marker    | Effect in<br>intervention<br>arm | Difference<br>between arms<br>(95%CI) <sup>+</sup> |
|---------------------------|---------------------------------|---------------------|----------------------|--------------------------------------------------------------------------|-------------------|------------------|-----------------|-----------------------|----------------------------------|----------------------------------------------------|
|                           |                                 |                     |                      | of bread, 500<br>g/month of<br>crackers and 1<br>kg/month of<br>biscuits |                   |                  |                 | HOMA-IR               | ↓↓                               | -0.50(-0.28;3.48)                                  |
|                           |                                 |                     |                      |                                                                          |                   |                  |                 | IL-10                 | ↓                                | 2.90(-1.06;6.86)                                   |
|                           |                                 |                     |                      |                                                                          |                   |                  |                 | IL-12                 | ↓                                | 1.60(-0.28;3.48)                                   |
|                           |                                 |                     |                      |                                                                          |                   |                  |                 | IL-17                 | ↓                                | <b>0.50(0.356;0.64)</b>                            |
|                           |                                 |                     |                      |                                                                          |                   |                  |                 | IL-1ra                | ↓                                | 5.90(-27.29;39.09)                                 |
|                           |                                 |                     |                      |                                                                          |                   |                  |                 | IL-4                  | <i>No effect</i>                 | 0.1(0.1;0.1)                                       |
|                           |                                 |                     |                      |                                                                          |                   |                  |                 | IL-6                  | <i>No effect</i>                 | <b>0.90(0.50;1.30)</b>                             |
|                           |                                 |                     |                      |                                                                          |                   |                  |                 | IL-8                  | ↓                                | -14.90(-35.38;5.58)                                |
|                           |                                 |                     |                      |                                                                          |                   |                  |                 | Insulin               | ↓                                | <b>-2.20(-3.98;-0.42)</b>                          |
|                           |                                 |                     |                      |                                                                          |                   |                  |                 | IP-10                 | ↓                                | -107.2(-<br>226.9;12.50)                           |
|                           |                                 |                     |                      | Wheat-based bread,<br>pasta, biscuits and<br>crackers                    |                   |                  |                 | LDL                   | ↓↓                               | 0.35(-0.23; 0.93)                                  |
|                           |                                 |                     |                      |                                                                          |                   |                  |                 | MIP-1α                | ↓                                | -7(-27.65;13.65)                                   |
|                           |                                 |                     |                      |                                                                          |                   |                  |                 | Malondialdehyd<br>e   | ↓↓                               | <b>-12.7(-21.29;-4.11)</b>                         |
|                           |                                 |                     |                      |                                                                          |                   |                  |                 | MCP-1                 | ↓↓                               | -0.70(-6.76;5.36)                                  |
|                           |                                 |                     |                      |                                                                          |                   |                  |                 | ROS-<br>granulocytes  | ↑                                | <b>-184(-251;-116)</b>                             |
|                           |                                 |                     |                      |                                                                          |                   |                  |                 | ROS-<br>lymphocytes   | ↓                                | <b>-205(-238;-172)</b>                             |
|                           |                                 |                     |                      |                                                                          |                   |                  |                 | TNFα                  | ↑                                | 3.1(0.04;6.16)                                     |
|                           |                                 |                     |                      |                                                                          |                   |                  |                 | Antioxidant<br>capac. | ↑↑                               | 1.6(1.42;1.78)                                     |
|                           |                                 |                     |                      |                                                                          |                   |                  |                 | TC                    | ↓↓                               | 0.32(-0.348;0.98)                                  |
|                           |                                 |                     |                      |                                                                          |                   |                  |                 | TG                    | ↓↓                               | 0.17(-0.25;0.58)                                   |
|                           |                                 |                     |                      |                                                                          |                   |                  |                 | VEGF                  | ↓                                | 3.3(-0.08;6.68)                                    |
| Stokić et al. (2015) [12] | 20/20                           | 4                   |                      |                                                                          | 300 g wheat bread |                  | 59.5            | BMI                   | <i>No effect</i>                 | -0.10(-0.41;0.21)                                  |



| Study (year)<br>[ref.]         | Intervention<br>(N)/control (n) | Duration<br>(weeks) | Intervention<br>type       | Intervention<br>dose        | Control                            | Health<br>Status   | Age<br>(years)* | CVD<br>risk marker  | Effect in<br>intervention<br>arm | Difference<br>between arms<br>(95%CI) <sup>+</sup> |
|--------------------------------|---------------------------------|---------------------|----------------------------|-----------------------------|------------------------------------|--------------------|-----------------|---------------------|----------------------------------|----------------------------------------------------|
|                                |                                 |                     | BW-enriched<br>wheat bread | 50 g wholegrain<br>BW flour |                                    | At risk for<br>CVD |                 | CRP                 | ↓↓                               | <b>0.12(0.03;0.21)</b>                             |
|                                |                                 |                     |                            |                             |                                    |                    |                 | DBP                 | ↓↓                               | 1.25(-0.25;2.75)                                   |
|                                |                                 |                     |                            |                             |                                    |                    |                 | HDL                 | ↑                                | -0.03(-0.13;0.07)                                  |
|                                |                                 |                     |                            |                             |                                    |                    |                 | LDL                 | ↓↓                               | <b>0.59(0.41;0.77)</b>                             |
|                                |                                 |                     |                            |                             |                                    |                    |                 | SBP                 | ↓↓                               | <b>2(0.28;3.72)</b>                                |
|                                |                                 |                     |                            |                             |                                    |                    |                 | TC                  | ↓                                | <b>0.29(0.07;0.51)</b>                             |
|                                |                                 |                     |                            |                             |                                    |                    |                 | TG                  | ↑                                | -0.04(-0.16;0.08)                                  |
| Stringer et al. (2013)<br>[13] | 7/6                             | 1                   | BW crackers                | 50 g wholegrain<br>BW flour | Rice cracker                       | Healthy and<br>T2D | 49.5            | Apo A1              | ↑↑                               | <b>0.45(0.19;0.71)</b>                             |
|                                |                                 |                     |                            |                             |                                    |                    |                 | Apo B               | ↓                                | <b>0.02(0.019;0.03)</b>                            |
|                                |                                 |                     |                            |                             |                                    |                    |                 | Apo C3              | ↑                                | <b>0.06(0.05;0.06)</b>                             |
|                                |                                 |                     |                            |                             |                                    |                    |                 | Glucose             | ↑↑                               | <b>0.26(0.03;0.49)</b>                             |
|                                |                                 |                     |                            |                             |                                    |                    |                 | HDL                 | ↓                                | 0.03(-0.06;0.12)                                   |
|                                |                                 |                     |                            |                             |                                    |                    |                 | LDL                 | ↑                                | -0.17(-0.38;0.04)                                  |
|                                |                                 |                     |                            |                             |                                    |                    |                 | TC                  | ↑                                | -0.23(-0.49;0.03)                                  |
| Wieslander (2011) [14]         | 30/32                           | 4                   | BW cookies                 | 100 g<br>(rutin≈360 mg)     | Common BW cookies<br>(rutin≈17 mg) | Healthy            | 46              | TG                  | ↑                                | -0.19(-0.36;-0.02)                                 |
|                                |                                 |                     |                            |                             |                                    |                    |                 | HDL                 | ↓↓                               | <b>0.21(0.13;0.29)</b>                             |
|                                |                                 |                     |                            |                             |                                    |                    |                 | HsCRP               | ↓                                | 0.25(-0.55;1.05)                                   |
|                                |                                 |                     |                            |                             |                                    |                    |                 | ECP                 | ↓                                | 0.10(-2.66;2.86)                                   |
|                                |                                 |                     |                            |                             |                                    |                    |                 | Myeloperoxidas<br>e | ↓                                | 13(-12.55;38.55)                                   |
|                                |                                 |                     |                            |                             |                                    |                    |                 | sPLA2-IIA           | ↓                                | 0.50(-0.33;1.33)                                   |
| Zhao and Guan (2003)<br>[15]   | 60/NA                           | 8                   | BW flour                   | Not stated                  | No control                         | T2D                | 26-67           | TC                  | ↓↓                               | <b>0.72(0.43;1.01)</b>                             |
|                                |                                 |                     |                            |                             |                                    |                    |                 | DBP                 | ↓                                | 2(-0.82;4.82)                                      |
|                                |                                 |                     |                            |                             |                                    |                    |                 | Glucose             | ↓↓                               | <b>1.2(0.78;1.62)</b>                              |
|                                |                                 |                     |                            |                             |                                    |                    |                 | HDL                 | ↑↑                               | <b>-0.1(-0.18;-0.02)</b>                           |
|                                |                                 |                     |                            |                             |                                    |                    |                 | LDL                 | ↓                                | 0.1(-0.09;0.29)                                    |
|                                |                                 |                     |                            |                             |                                    |                    |                 | SBP                 | ↓↓                               | <b>6(1.66;10.34)</b>                               |

| Study (year)<br>[ref.]   | Intervention<br>(N)/control (n) | Duration<br>(weeks) | Intervention<br>type | Intervention<br>dose | Control    | Health<br>Status | Age<br>(years)* | CVD<br>risk marker | Effect in<br>intervention<br>arm | Difference<br>between arms<br>(95%CI) <sup>+</sup> |
|--------------------------|---------------------------------|---------------------|----------------------|----------------------|------------|------------------|-----------------|--------------------|----------------------------------|----------------------------------------------------|
| Zheng et al. (1991) [16] | 19/NA                           | 12                  | Tartary BW flour     | 50g                  | No control | NIDDM            | 53.8            | TC                 | ↓↓                               | 0.3(0.11;0.49)                                     |
|                          |                                 |                     |                      |                      |            |                  |                 | TG                 | ↓                                | 0.2(0;0.4)                                         |
|                          |                                 |                     |                      |                      |            |                  |                 | Weight             | No effect                        | -                                                  |
|                          |                                 |                     |                      |                      |            |                  |                 | Apo A1             | ↑                                | -14.32(-17.29;-11.35)                              |
|                          |                                 |                     |                      |                      |            |                  |                 | Apo B              | ↓↓                               | 20.31(17.22;23.40)                                 |
|                          |                                 |                     |                      |                      |            |                  |                 | Glucose            | ↓                                | 0.24(0.01;0.47)                                    |
|                          |                                 |                     |                      |                      |            |                  |                 | HbA1c              | ↑                                | -8.25(-10.02;-6.48)                                |
|                          |                                 |                     |                      |                      |            |                  |                 | Insulin            | ↑                                | -42(-44;-41)                                       |
|                          |                                 |                     |                      |                      |            |                  |                 | TC                 | ↓                                | 0.66(0.57;0.75)                                    |
|                          |                                 |                     |                      |                      |            |                  |                 | TG                 | ↓↓                               | 0.65(0.49;0.81)                                    |

\* Age is indicated mean age and in case mean was not available, age range is provided.

<sup>+</sup> Data are provided as difference of the mean differences in the control/intervention group accompanied by their respective 95% confidence intervals. In all cases that this difference was not possible/applicable to quantify this difference, the mean difference in the intervention arm (accompanied by 95%CI) is provided in grey shading – statistically significant values are bolded.

Note: ↑: increase; ↓: decrease; ↑↑: statistically significant increase; ↓↓: statistically significant decrease. Abbreviations: HC: patients with hypercholesterolemia; T2D: type 2 diabetes; NCGS: Non-celiac gluten sensitivity; NIDDM: Non-insulin-dependent diabetes mellitus TC: Total cholesterol; TG: triglycerides; BMI: Body mass index; CRP: C-reactive protein; SBP: systolic blood pressure; DBP: diastolic blood pressure; TBARS: Thiobarbituric acid reactive substance; ECP: Serum eosinophilic cation protein; sPLA2-IIA: sPLA2 - group IIA secretory phospholipase A2; MPO Serum myeloperoxidase; HsCRP: high-sensitivity C-reactive protein; VEGF: Vascular endothelial growth factor; Apo A1: Apolipoprotein A1; Apo A2: Apolipoprotein A2; Apo B: Apolipoprotein B; Apo C3: Apolipoprotein C3; ROS: reactive oxygen species; MIP-1α: Macrophage Inflammatory Protein-1 beta; IP-10: Interferon Gamma-Induced Protein 10; HOMA-IR: Homeostatic Model Assessment for Insulin Resistance; oxLDL: oxidized LDL cholesterol; HbA1c: Glycated hemoglobin; HDL: High density lipoprotein; LDL: Low density lipoprotein; BF: Body fatness; AIP: Atherogenic index of plasma; TNF-α: Tumor necrosis factor; vLDL: very low density lipoprotein; All 'IL-' abbreviations followed by a number, indicate 'Interleukin': in case of IL-1ra, the 'ra' indicates 'receptor agonist'; Trial duration indicates only the first period in case of crossover trials.

- [1] B. Archimowicz-Cyrylowska, B. Adamek, M. Drożdżik, L. Samochowiec, and J. Wójcicki. Clinical effect of buckwheat herb, Ruscus extract and troxerutin on retinopathy and lipids in diabetic patients. *Phytother Res* 10 (1996) 659-662.
- [2] R.L. Bijlani, S. Sud, A. Sahi, B.M. Gandhi, and B.N. Tandon. Effect of sieved buckwheat (*Fagopyrum esculentum*) flour supplementation on lipid profile and glucose tolerance. *Indian J Physiol Pharmacol* 29 (1984) 69-74.
- [3] R.L. Bijlani, B.M. Gandhi, M.C. Gupta, S. Manocha, and B.N. Tandon. Effect of whole buckwheat (*Fagopyrum esculentum*) flour supplementation on lipid profile & glucose tolerance. *Indian J Med Res* 81 (1985) 162-168.

- 
- [4] M. Dinu, D. Macchia, G. Pagliai, A.M. Gori, F. Cesari, et al. Symptomatic efficacy of buckwheat products in Non-Celiac Gluten Sensitivity (NCGS). *Asia Pac J Clin Nutr* 26 (2017) 630-636.
- [5] G. Huang, M. Huang, W. Chen, Y. Huang, Z. Yang, and Y. You. Clinical effects of tartary buckwheat mixture on the treatment of early diabetic and nephropathy. *J. Chin. Med. Mater* 32 (2009) 1932-1935.
- [6] A. Misan, A. Petelin, M. Stubelj, A. Mandic, O. Simurina, et al. Buckwheat - enriched instant porridge improves lipid profile and reduces inflammation in participants with mild to moderate hypercholesterolemia. *Journal of Functional Foods* 36 (2017) 186-194.
- [7] M. Nishimura, T. Ohkawara, Y. Sato, H. Satoh, T. Suzuki, et al. Effectiveness of rutin-rich Tartary buckwheat (*Fagopyrum tataricum* Gaertn.) 'Manten-Kirari' in body weight reduction related to its antioxidant properties: A randomised, double-blind, placebo-controlled study. *Journal of Functional Foods* 26 (2016) 460-469.
- [8] J. Qiu (a), Z. Li, Y. Qin, Y. Yue, and Y. Liu. Protective effect of tartary buckwheat on renal function in type 2 diabetics: A randomized controlled trial. *Ther Clin Risk Manage* 12 (2016) 1721-1727.
- [9] J. Qiu (b), Y. Liu, Y. Yue, Y. Qin, and Z. Li. Dietary tartary buckwheat intake attenuates insulin resistance and improves lipid profiles in patients with type 2 diabetes: a randomized controlled trial. *Nutr Res* 36 (2016) 1392-1401.
- [10] M. Shakib, S. Gabrial, and G. Gabrial. Buckwheat consumption improved lipid profile, fasting and postprandial blood glucose in hypercholesterolemic and type 2 diabetic patients. *Int. J. Acad. Res.* 3 (2011) 132-139.
- [11] F. Sofi, L. Ghiselli, A. Whittaker, G. Pagliai, F. Cesari, et al. Consumption of buckwheat products and cardiovascular risk profile: A randomized single-blinded crossover trial. *Nutr. Food Sci.* 6 (2016) 1-8.
- [12] E. Stokic, A. Mandic, M. Sakac, A. Misan, M. Pestoric, et al. Quality of buckwheat-enriched wheat bread and its antihyperlipidemic effect in statin treated patients. *LWT* 63 (2015) 556-561.
- [13] D.M. Stringer, C.G. Taylor, P. Appah, H. Blewett, and P. Zahradka. Consumption of buckwheat modulates the post-prandial response of selected gastrointestinal satiety hormones in individuals with type 2 diabetes mellitus. *Metab Clin Exp* 62 (2013) 1021-1031.
- [14] G. Wieslander, N. Fabjan, M. Vogrincic, I. Kreft, C. Janson, et al. Eating buckwheat cookies is associated with the reduction in serum levels of myeloperoxidase and cholesterol: a double blind crossover study in day-care centre staffs. *Tohoku J Exp Med* 225 (2011) 123-130.
- [15] J. Zhao, and L. Guan. Effects of buckwheat flour eating for 8 weeks on blood glucose, serum lipids levels and blood pressure. *Chin. J. Clin. Rehabil* 7 (2003) 2231.
- [16] G. Zheng, X. Pan, Z. An, and Y. Wang. Preliminary observation of lipid-decreasing effects of compound Tartary buckwheat flour on niddm patients. *Beijing Med. J* 5 (1991) 280-281.

## Meta-analysis summary

**Table S3. Meta-analysis of randomized clinical trials comparing buckwheat supplementation versus control**

| Outcome                          | Number. of<br>unique studies | Size of the<br>intervention arm | WMD (95% CI)         | I <sup>2</sup> | P value for<br>heterogeneity | P-value for<br>publication bias |
|----------------------------------|------------------------------|---------------------------------|----------------------|----------------|------------------------------|---------------------------------|
| <b>Blood lipids</b>              |                              |                                 |                      |                |                              |                                 |
| Total cholesterol, <i>mmol/L</i> | 8                            | 220                             | -0.14 (-0.30; 0.02)  | 83.4%          | 0.002                        | 0.67                            |
| Triglycerides, <i>mmol/L</i>     | 8                            | 220                             | -0.02 (-0.15; 0.11)  | 85.5%          | <0.001                       | 0.20                            |
| HDL, <i>mmol/L</i>               | 8                            | 220                             | -0.04 (-0.09; 0.02)  | 78.3%          | 0.03                         | 0.78                            |
| LDL, <i>mmol/L</i>               | 7                            | 200                             | -0.03 (-0.02; 0.16)  | 89.4%          | <0.001                       | 0.98                            |
| <b>Body morphology</b>           |                              |                                 |                      |                |                              |                                 |
| Weight, <i>kg</i>                | 3                            | 165                             | -0.14 (-1.50; 1.23)  | 0%             | 0.99                         | NA                              |
| <b>Glucose Homeostasis</b>       |                              |                                 |                      |                |                              |                                 |
| Glucose, <i>mmol/L</i>           | 6                            | 139                             | -0.18 (-0.36; 0.003) | 87.7%          | 0.001                        | 0.26                            |

Note: WMD: Weighted mean difference I<sup>2</sup>: variation across studies that is due to heterogeneity rather than chance; NA: Not applicable.

**Table S4. Sensitivity analysis of the meta-analysis of randomized clinical trials comparing buckwheat supplementation versus control on blood lipids**

| Outcome           | Number of<br>unique studies | WMD (95% CI)          | I <sup>2</sup> | P value for<br>heterogeneity | P-value for<br>meta regression |
|-------------------|-----------------------------|-----------------------|----------------|------------------------------|--------------------------------|
| Total Cholesterol |                             |                       |                |                              |                                |
| Location          |                             |                       |                |                              |                                |
| Europe            | 4                           | -0.28 (-0.37; -0.187) | 0%             | 0.57                         | 0.59                           |
| Non-Europe        | 4                           | 0.01 (-0.18; 0.21)    | 57.8%          | 0.07                         |                                |
| Trial duration    |                             |                       |                |                              |                                |
| ≤5 weeks          | 3                           | -0.15 (-0.54; 0.24)   | 85.5%          | 0.001                        | 0.57                           |
| >5 weeks          | 5                           | -0.14 (0.32; 0.03)    | 50.8%          | 0.09                         |                                |
| Females (%)       |                             |                       |                |                              |                                |
| ≤50%              | 3                           | 0.02 (-0.29; 0.32)    | 71.7%          | 0.03                         | 0.56                           |
| >50%              | 5                           | -0.23 (-0.41; -0.05)  | 59.6%          | 0.04                         |                                |
| Health status     |                             |                       |                |                              |                                |
| Healthy           | 4                           | -0.08 (-0.23; 0.07)   | 12.6%          | 0.33                         | 0.78                           |
| Unhealthy         | 3                           | -0.28 (-0.37; -0.19)  | 69.1%          | 0.002                        |                                |
| Mix*              | 1                           | 0.23 (-0.02; 0.48)    | NA             | NA                           |                                |
| Publication year  |                             |                       |                |                              |                                |
| ≤2000             | 2                           | -0.11 (-0.46; 0.24)   | 19.5%          | 0.27                         | 0.38                           |
| >2000             | 6                           | -0.15 (-0.34; 0.04)   | 76.4%          | 0.001                        |                                |
| Triglycerides     |                             |                       |                |                              |                                |
| Location          |                             |                       |                |                              |                                |
| Europe            | 4                           | -0.05 (-0.22; 0.11)   | 85.3%          | 0.09                         | 0.83                           |
| Non-Europe        | 4                           | 0.015 (-0.22; 0.24)   | 53.1%          | <0.001                       |                                |
| Trial duration    |                             |                       |                |                              |                                |
| ≤5 weeks          | 3                           | 0.05 (-0.16; 0.26)    | 61.4%          | 0.08                         | 0.60                           |
| >5 weeks          | 5                           | -0.07 (-0.24; 0.11)   | 80.9%          | <0.001                       |                                |

| Outcome          | Number of<br>unique studies | WMD (95% CI)                | I <sup>2</sup> | P value for<br>heterogeneity | P-value for<br>meta regression |
|------------------|-----------------------------|-----------------------------|----------------|------------------------------|--------------------------------|
| Females (%)      |                             |                             |                |                              |                                |
| ≤50%             | 3                           | -0.02 (-0.36; 0.32)         | 88.6%          | <0.001                       | 0.68                           |
| >50%             | 5                           | 0.02 (-0.10; 0.13)          | 47.3%          | 0.11                         |                                |
| Health status    |                             |                             |                |                              |                                |
| Healthy          | 3                           | -0.11 (-0.43; 0.21)         | 87.3%          | <0.001                       | 0.98                           |
| Unhealthy        | 4                           | -0.01 (-0.15; 0.13)         | 43.5%          | 0.15                         |                                |
| Mix              | 1                           | <b>0.19 (0.03; 0.35)</b>    | NA             | NA                           |                                |
| Publication year |                             |                             |                |                              |                                |
| ≤2000            | 2                           | <b>-0.28 (-0.43; -0.13)</b> | 0%             | 0.53                         | 0.66                           |
| >2000            | 6                           | 0.08 (-0.001; 0.16)         | 29.6%          | 0.21                         |                                |
| HDL Cholesterol  |                             |                             |                |                              |                                |
| Location         |                             |                             |                |                              |                                |
| Europe           | 4                           | -0.04 (-0.09; 0.02)         | 72.4%          | 0.01                         | 0.90                           |
| Non-Europe       | 4                           | -0.02 (-0.06; 0.02)         | 0%             | 0.93                         |                                |
| Trial duration   |                             |                             |                |                              |                                |
| ≤5 weeks         | 3                           | -0.002 (-0.05; 0.02)        | 13.9%          | 0.31                         | 0.77                           |
| >5 weeks         | 5                           | <b>-0.09 (-0.14; -0.04)</b> | 6.4%           | 0.37                         |                                |
| Females (%)      |                             |                             |                |                              |                                |
| ≤50%             | 3                           | -0.01 (-0.06; 0.03)         | 0%             | 0.91                         | 0.56                           |
| >50%             | 5                           | -0.05 (-0.15; 0.04)         | 65.6%          | 0.02                         |                                |
| Health status    |                             |                             |                |                              |                                |
| Healthy          | 3                           | -0.03 (-0.11; 0.04)         | 0%             | 0.88                         | 0.78                           |
| Unhealthy        | 4                           | -0.04 (-0.14; 0.06)         | 80.6%          | 0.001                        |                                |
| Mix              | 1                           | -0.03 (-0.14; 0.05)         | NA             | NA                           |                                |
| Publication year |                             |                             |                |                              |                                |

---

| Outcome | Number of<br>unique studies | WMD (95% CI)        | I <sup>2</sup> | P value for<br>heterogeneity | P-value for<br>meta regression |
|---------|-----------------------------|---------------------|----------------|------------------------------|--------------------------------|
| ≤2000   | 2                           | -0.03 (-0.17; 0.11) | 0%             | 0.45                         | 0.41                           |
| >2000   | 6                           | -0.04 (-0.09; 0.02) | 67.5%          | 0.009                        |                                |

\* 'Mix' category indicates those trials that included both healthy and unhealthy subjects.

Note: WMD: Weighted mean difference I<sup>2</sup>: variation across studies that is due to heterogeneity rather than chance  
Statistically significant values are bolded.

## Methodological quality assessment

Figure S1. Methodological quality of included nonrandomized studies based on ROBINS-I tool

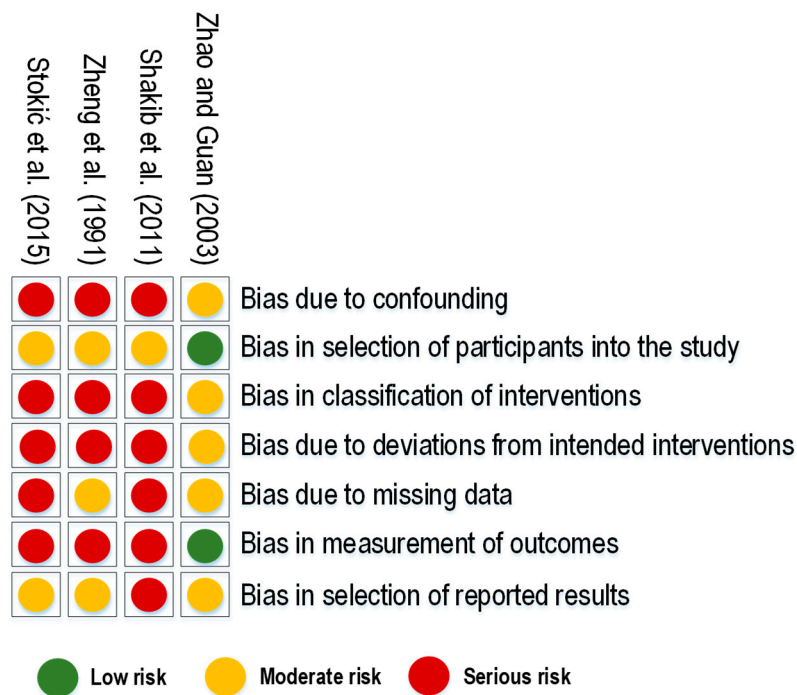

Figure S2. Methodological quality of included randomized controlled trials based on Cochrane's Collaboration Tool (RoB2) for randomized controlled trials

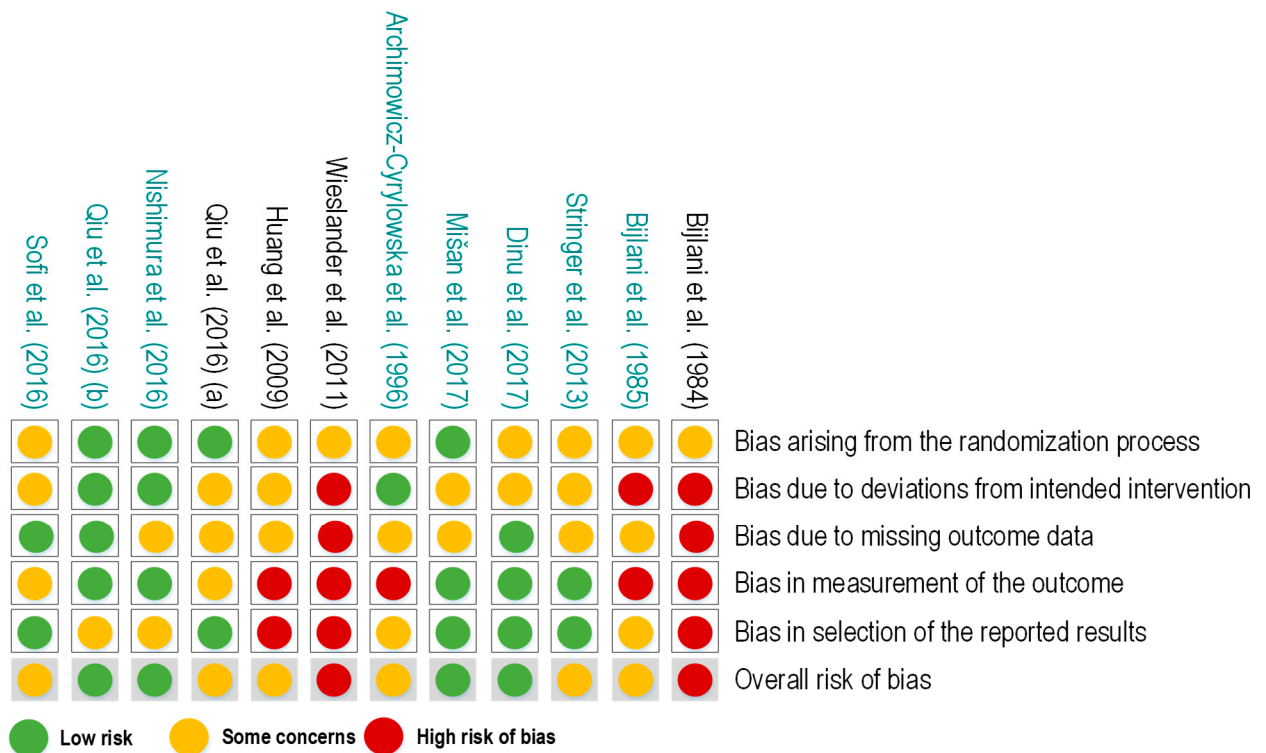



---

## Publication bias

**Figure S3. Publication bias of meta-analysis of buckwheat and total cholesterol**

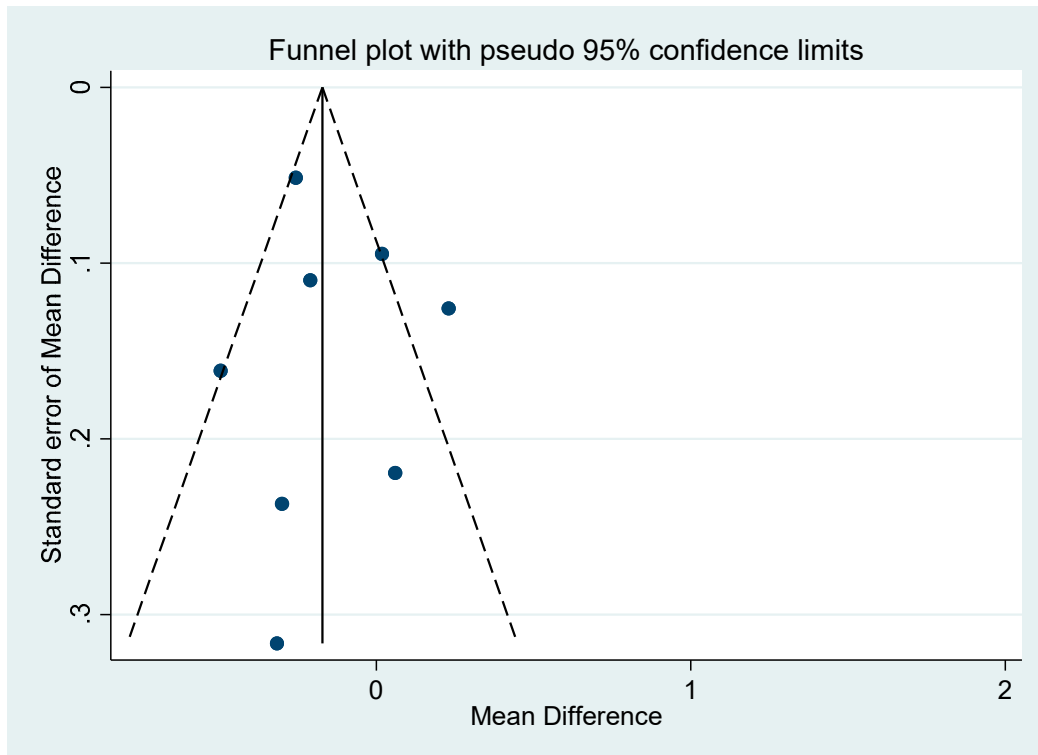

**Figure S4. Publication bias of meta-analysis of buckwheat and triglycerides**

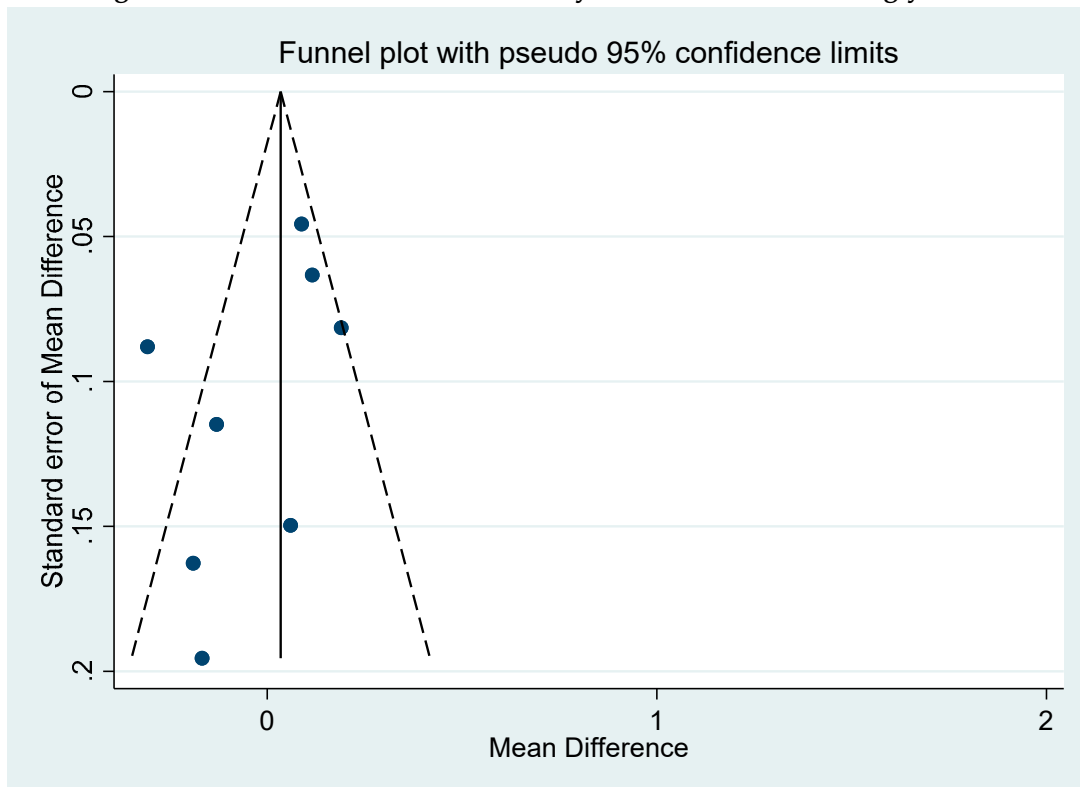

**Figure S5. Publication bias of meta-analysis of buckwheat and HDL**

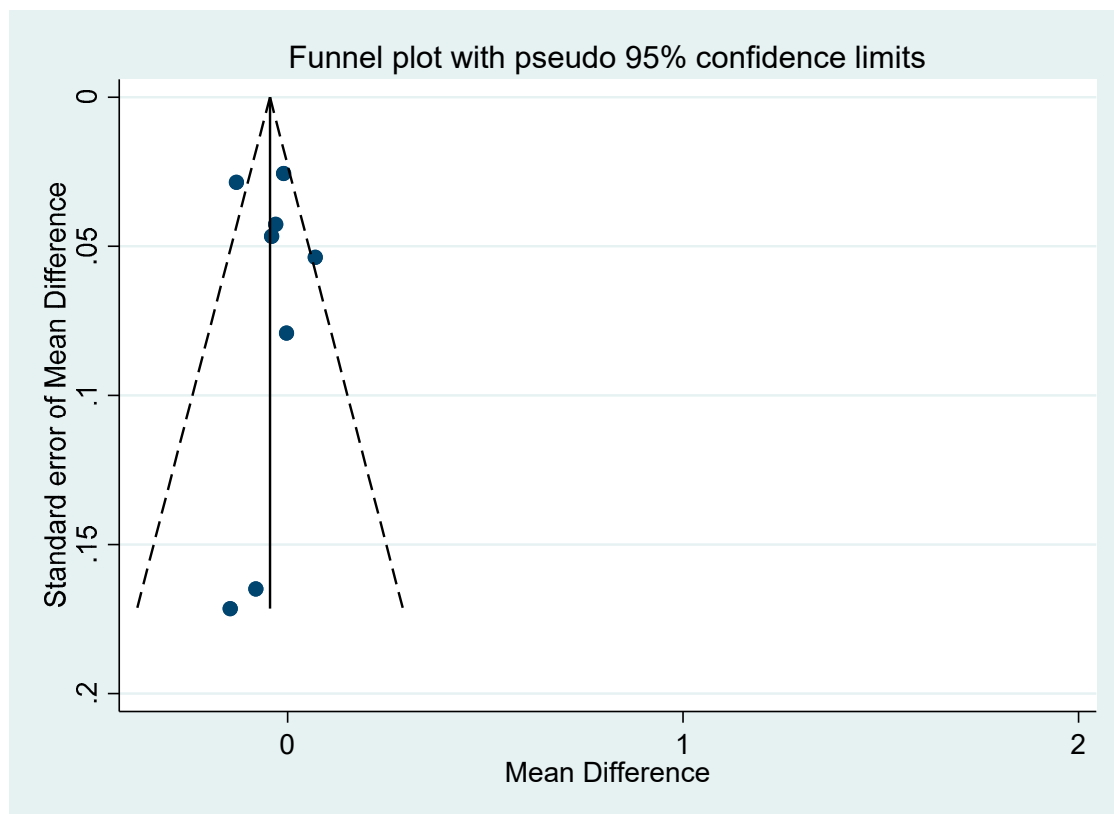

Figure S6. Publication bias of meta-analysis of buckwheat and LDL

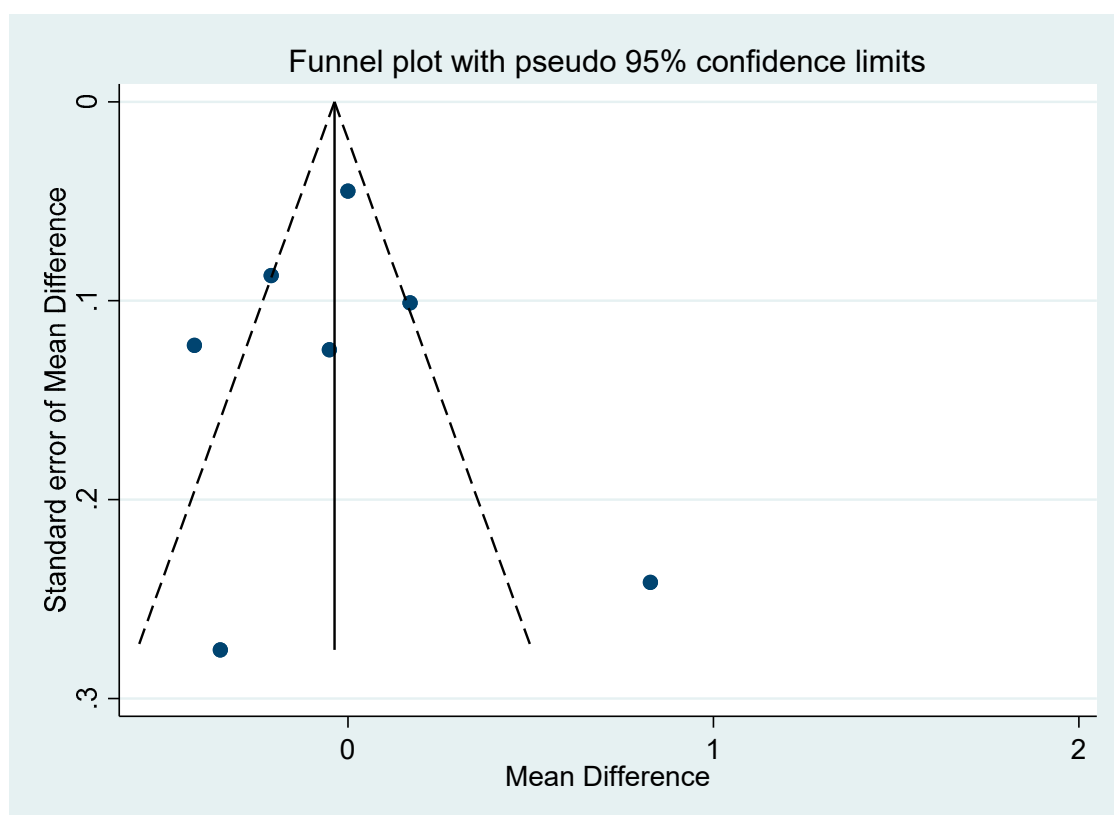

Figure S7. Publication bias of meta-analysis of buckwheat and glucose

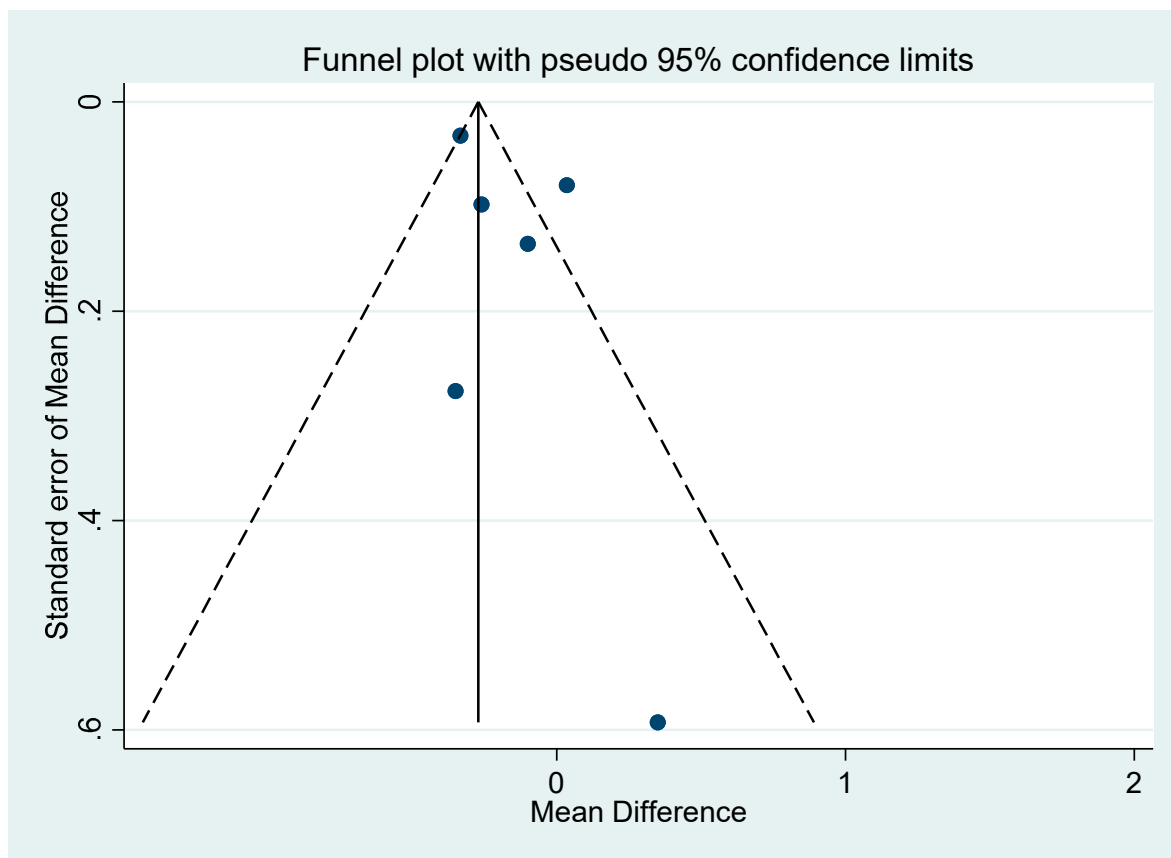

## Sensitivity analysis of the meta-analysis on total cholesterol after removing the non-grain component study

Figure S8. Sensitivity analysis of the meta-analysis on total cholesterol after removing the non-grain component study (i.e. Archimowicz-Cyrylowska et al. (1996))

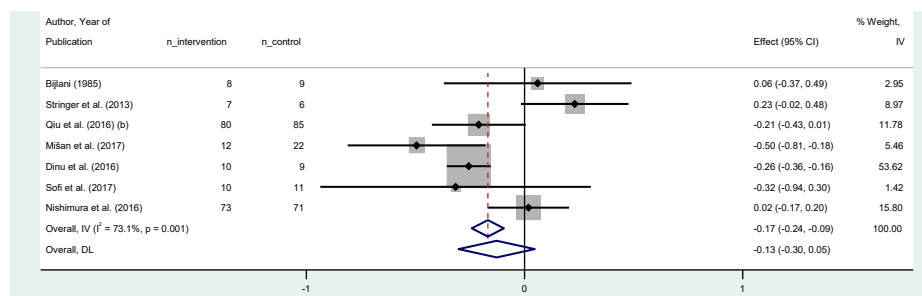

Figure S9. Sensitivity analysis of the meta-analysis on triglycerides after removing the non-grain component study (i.e. Archimowicz-Cyrylowska et al. (1996))

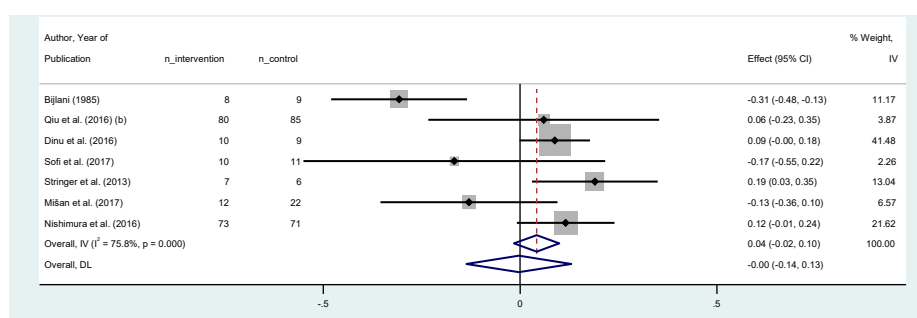

Figure S10. Sensitivity analysis of the meta-analysis on HDL cholesterol after removing the non-grain component study (i.e. Archimowicz-Cyrylowska et al. (1996))

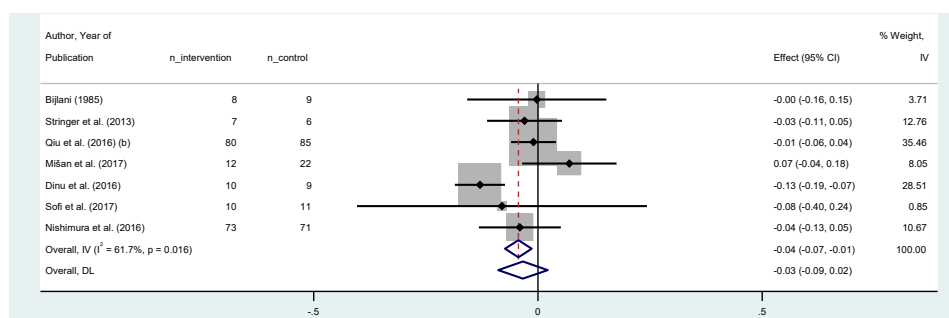

Figure S11. Sensitivity analysis of the meta-analysis on glucose after removing the non-grain component study (i.e. Archimowicz-Cyrylowska et al. (1996))

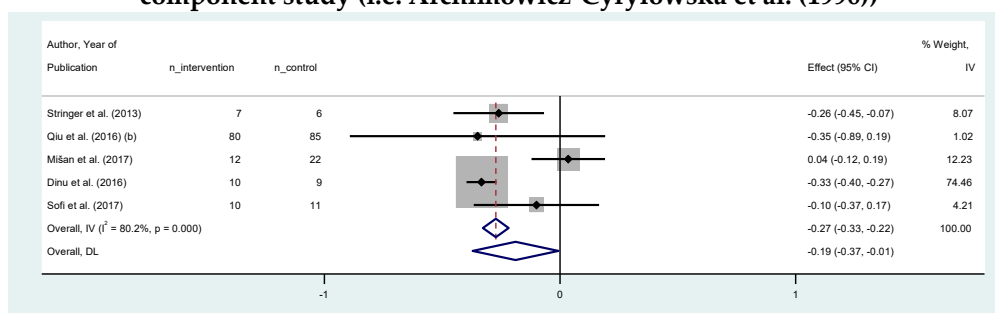

**Table S5. Lipid profile markers at baseline**

| Author, Year of Publication          | Outcome           | Unit   | Intervention arm size | Mean value at baseline |
|--------------------------------------|-------------------|--------|-----------------------|------------------------|
| Bijlani (1985)                       | LDL cholesterol   | mmol/L | 8                     | 2.08                   |
| Stringer et al. (2013)               | LDL cholesterol   | mmol/L | 7                     | 2.65                   |
| Qiu et al. (2016) (b)                | LDL cholesterol   | mmol/L | 80                    | 3.00                   |
| Mišan et al. (2017)                  | LDL cholesterol   | mmol/L | 12                    | 4.55                   |
| Dinu et al. (2016)                   | LDL cholesterol   | mmol/L | 10                    | 2.89                   |
| Sofi et al. (2017)                   | LDL cholesterol   | mmol/L | 10                    | 3.14                   |
| Nishimura et al. (2016)              | LDL cholesterol   | mmol/L | 73                    | 4.07                   |
| Bijlani (1985)                       | HDL cholesterol   | mmol/L | 8                     | 1.02                   |
| Stringer et al. (2013)               | HDL cholesterol   | mmol/L | 7                     | 1.25                   |
| Qiu et al. (2016) (b)                | HDL cholesterol   | mmol/L | 80                    | 1.20                   |
| Mišan et al. (2017)                  | HDL cholesterol   | mmol/L | 12                    | 1.37                   |
| Dinu et al. (2016)                   | HDL cholesterol   | mmol/L | 10                    | 1.86                   |
| Sofi et al. (2017)                   | HDL cholesterol   | mmol/L | 10                    | 1.62                   |
| Nishimura et al. (2016)              | HDL cholesterol   | mmol/L | 73                    | 1.87                   |
| Archimowicz-Cyrylowska et al. (1996) | HDL cholesterol   | mmol/L | 20                    | 1.16                   |
| Bijlani (1985)                       | Triglycerides     | mmol/L | 8                     | 1.00                   |
| Qiu et al. (2016) (b)                | Triglycerides     | mmol/L | 80                    | 2.10                   |
| Dinu et al. (2016)                   | Triglycerides     | mmol/L | 10                    | 0.95                   |
| Sofi et al. (2017)                   | Triglycerides     | mmol/L | 10                    | 1.28                   |
| Archimowicz-Cyrylowska et al. (1996) | Triglycerides     | mmol/L | 20                    | 1.64                   |
| Stringer et al. (2013)               | Triglycerides     | mmol/L | 7                     | 1.27                   |
| Mišan et al. (2017)                  | Triglycerides     | mmol/L | 12                    | 1.89                   |
| Nishimura et al. (2016)              | Triglycerides     | mmol/L | 73                    | 0.95                   |
| Bijlani (1985)                       | Total cholesterol | mmol/L | 8                     | 4.55                   |
| Stringer et al. (2013)               | Total cholesterol | mmol/L | 7                     | 4.27                   |
| Qiu et al. (2016) (b)                | Total cholesterol | mmol/L | 80                    | 5.08                   |
| Mišan et al. (2017)                  | Total cholesterol | mmol/L | 12                    | 6.82                   |
| Dinu et al. (2016)                   | Total cholesterol | mmol/L | 10                    | 5.33                   |
| Sofi et al. (2017)                   | Total cholesterol | mmol/L | 10                    | 5.23                   |
| Nishimura et al. (2016)              | Total cholesterol | mmol/L | 73                    | 6.25                   |
| Archimowicz-Cyrylowska et al. (1996) | Total cholesterol | mmol/L | 20                    | 5.70                   |

**Note:** Mean values at baseline that were out of normal range are highlighted in grey  
Ranges considered normal: LDL cholesterol: <3.4 mmol/L; Total cholesterol: <5.2 mmol/L; HDL cholesterol: >1.6 mmol/L; Triglycerides: <1.7 mmol/L.

---

## Leave-one-out analysis

**Figure S12. Leave one out sensitivity analysis for total cholesterol**

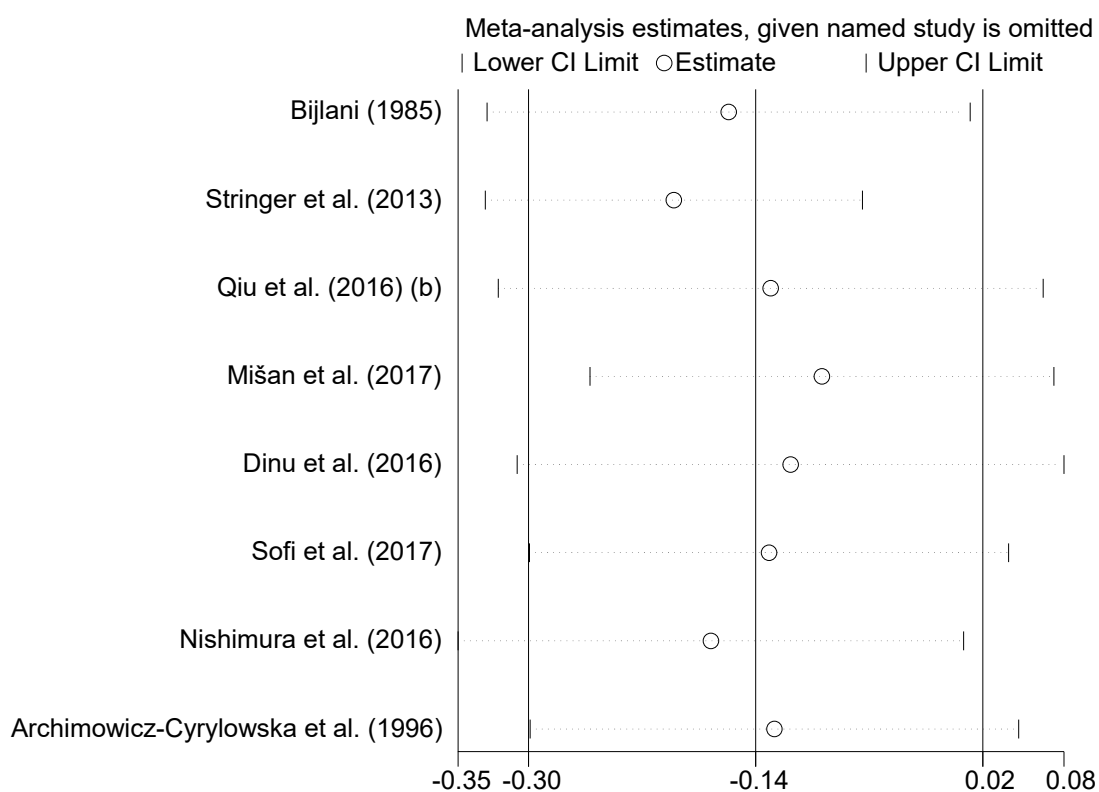

*Note:* Removing stringer et al makes it significant beneficial -0.20 (-0.33; -0.065)

**Figure S13. Leave one out sensitivity analysis for triglycerides**

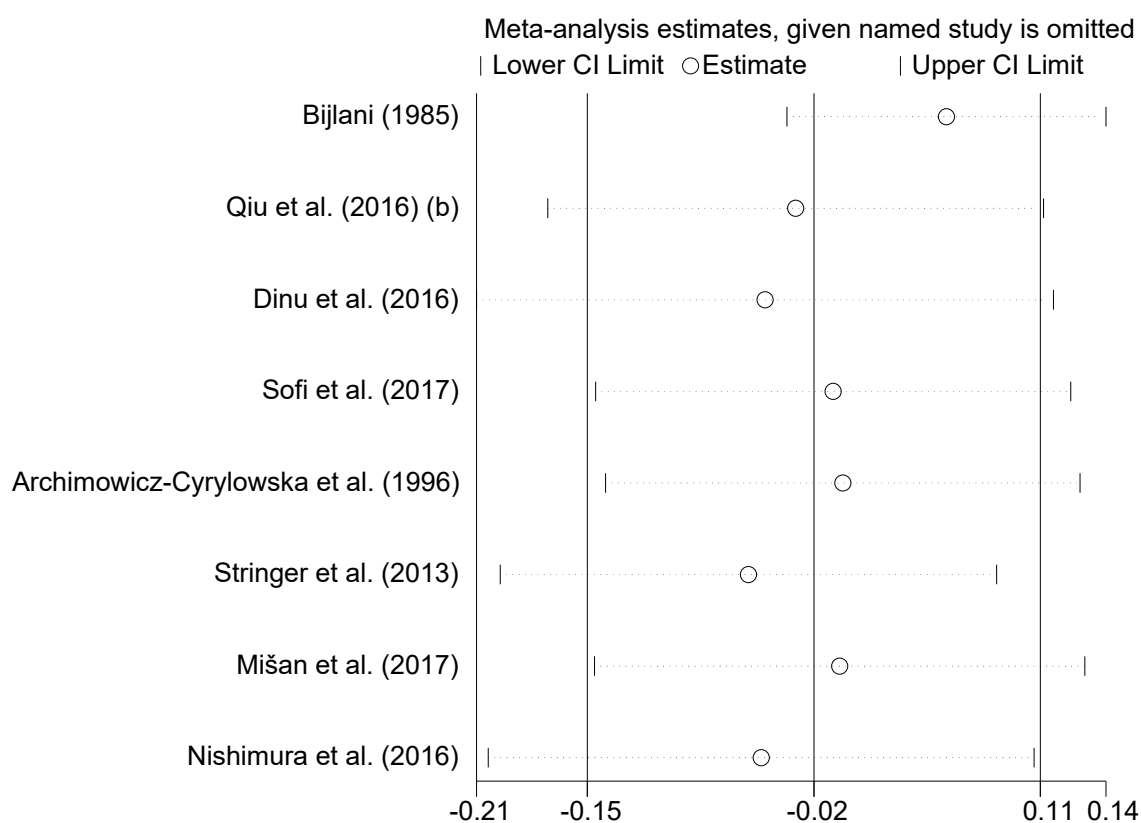

Note: There was no difference in the overall effect for any study

**Figure S14. Leave one out sensitivity analysis for HDL Cholesterol**

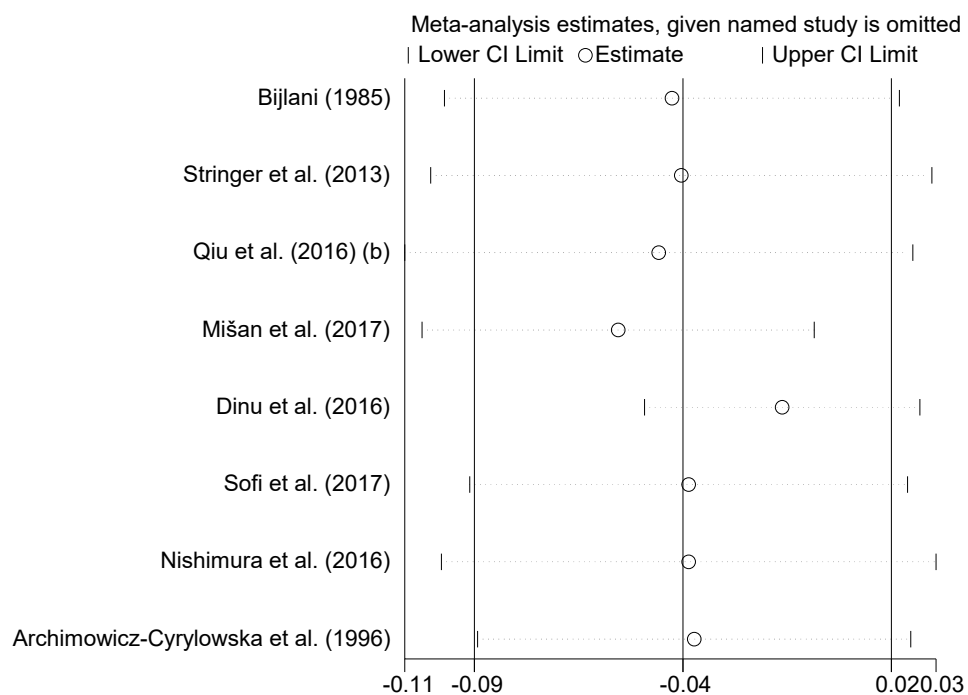

Note: Removing Mišan et al generated a significant beneficial effect on HDL cholesterol: -0.05 (-0.10; -0.03)



**Figure S15. Leave one out sensitivity analysis for LDL Cholesterol**

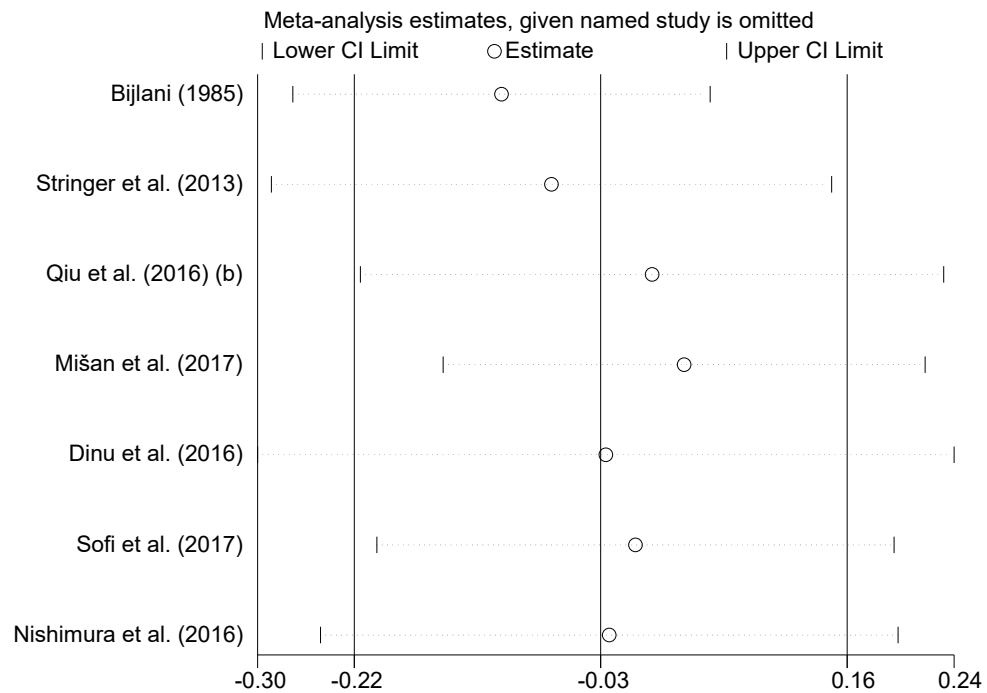

Note: There was no difference in the overall effect for any study.

**Figure S16. Leave one out sensitivity analysis for glucose**

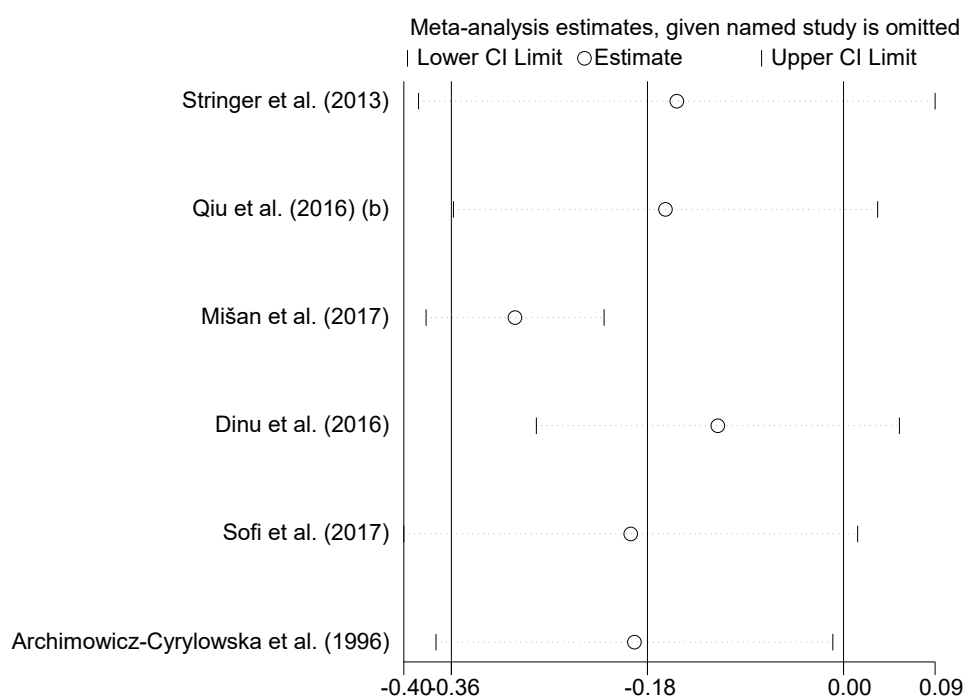

Note: Removing Mišan et al significant beneficial: -0.30; -0.38; -0.22
